# Supplementary material for: Interventions for management of post-stroke depression: A Bayesian network meta-analysis of 23 randomized controlled trials
Source: PubMed Central journal article supplement (PMC5705605; doi:10.1038/s41598-017-16663-0), 2017-11-28
Supplement: 41598_2017_16663_MOESM1_ESM.pdf [file 41598_2017_16663_MOESM1_ESM.pdf]

## Additional file : Appendices 1-10

Interventions for management of post-stroke depression: A Bayesian network meta-analysis of 23 randomized controlled trials

Linghui Deng<sup>1\*</sup>, Xuejun Sun<sup>2\*</sup>, Shi Qiu<sup>3\*</sup>, Yao Xiong<sup>1</sup>, Yuxiao Li<sup>1</sup>, Lu Wang<sup>1</sup>, Qiang Wei<sup>3</sup>, Deren Wang<sup>1#</sup>, Ming Liu<sup>1#</sup>

\* LHD, XJS and SQ contributed equally as the first authors of this manuscript.

1.Stroke Clinical Research Unit, Department of Neurology, West China Hospital, Sichuan University, Chengdu, Sichuan. China.

2.Second Department of Psychiatry, Kangning Hospital, Anshan, Liaoning, China

3.Department of Urology, Institute of Urology, West China Hospital, Sichuan University, Chengdu, Sichuan, China.

#Correspondence to:

#Dr Ming Liu (full professor), Stroke Clinical Research Unit, Department of Neurology, West China Hospital, Sichuan University, Chengdu, Sichuan. China. E-mail: wyplmh@hotmail.com

OR

#Dr Deren Wang, Stroke Clinical Research Unit, Department of Neurology, West China Hospital, Sichuan University, Chengdu, Sichuan. China; wdr0128@qq.com

# **Additional file 1: Appendices 1-10**

## **Abbreviations**

**Appendix 1: PRISMA network meta-analysis checklist**

**Appendix 2: Search algorithms**

**Appendix 3: References for included trials**

**Appendix 4: Description of included studies, outcomes**

**Appendix 5: Risk of bias assessments within studies**

**Appendix 6: Network plot for each outcome**

**Appendix 7: Assessment of inconsistency**

**Appendix 8: Treatment ranking and SUCRA plot for each outcome**

**Appendix 9: Subgroup analysis**

**Appendix 10: Post hoc analysis**

## Abbreviations

PSD= post-stroke depression

HAMD= Hamilton Depression Rating Scale(or HRSD);

DSM= Diagnostic and Statistical Manual of Mental Disorders

RCT= traditional Chinese medicine

SSRI= selective serotonin reuptake inhibitor

TCA= tricyclic antidepressant

SNRI= serotonin–norepinephrine reuptake inhibitors

NRI= norepinephrine reuptake inhibitor

N+A= nimodipine plus antidepressants

TCM= traditional Chinese medicine

rTMS= Repetitive Transcranial Magnetic Stimulation

P+A= psychotherapy plus antidepressants

FEWP=Free and Easy Wanderer Plus (a kind of Chinese medicine; its original Chinese Name is Jia-Wei-Xiao-Yao-San)

MMSE= Mini-mental State examination;

NR=not reported

SD= standard deviation

ITT = intention-to-treat

PP= per protocol

BDI=Beck Depression Inventory

CT=computed tomography

MRI=magnetic resonance imaging

SAH=subarachnoid hemorrhage

TIA=transient ischemic attack

TCD=total cumulative dose

## Appendix 2: Search algorithms

| Medline |                                                                                                                                                                                                        |
|---------|--------------------------------------------------------------------------------------------------------------------------------------------------------------------------------------------------------|
| #1      | “randomized controlled trial” [Publication Type]                                                                                                                                                       |
| #2      | “controlled clinical trial” [Publication Type]                                                                                                                                                         |
| #3      | “randomized” [Title/Abstract]                                                                                                                                                                          |
| #4      | “randomly” [Title/Abstract]                                                                                                                                                                            |
| #5      | “trial” [Title]                                                                                                                                                                                        |
| #6      | “Randomized Controlled Trial as Topic” [MeSH]                                                                                                                                                          |
| #7      | (#1) OR (#2) OR (#3) OR (#4) OR (#5) OR (#6)                                                                                                                                                           |
| #8      | “PSD” [Title/Abstract]                                                                                                                                                                                 |
| #9      | “post-stroke depression” [Title/Abstract]                                                                                                                                                              |
| #10     | “post-stroke depressive” [Title/Abstract]                                                                                                                                                              |
| #11     | “depression after stroke” [Title/Abstract]                                                                                                                                                             |
| #12     | “depression in stroke patients” [Title/Abstract]                                                                                                                                                       |
| #13     | “depression after cerebral apoplexy” [Title/Abstract]                                                                                                                                                  |
| #14     | “depression after cerebrovascular accident” [Title/Abstract]                                                                                                                                           |
| #15     | “depression after cerebrovascular disease” [Title/Abstract]                                                                                                                                            |
| #16     | (#8) OR (#9) OR (#10) OR (#11) OR (#12) OR (#13) OR (#14) OR (#15)                                                                                                                                     |
| #17     | “Therapeutics” [Mesh] OR “Antidepressive Agents” [Mesh]                                                                                                                                                |
| #18     | “Serotonin Uptake Inhibitors” [Mesh] OR “Fluoxetine” [Mesh] OR “Sertraline” [Mesh] OR “Paroxetine” [Mesh] OR<br>“Citalopram” [Mesh] OR “Fluvoxamine” [Mesh] OR “Escitalopram” [Title/Abstract]         |
| #19     | “Antidepressive Agents, Tricyclic” [Mesh] OR “Nortriptyline” [Mesh] OR “Imipramine” [Mesh] OR “Clomipramine” [Mesh]<br>OR “Amitriptyline” [Mesh]                                                       |
| #20     | “serotonin norepinephrine reuptake inhibitor” [Title/Abstract] OR “SNRI” [Title/Abstract] OR “Venlafaxine” [Mesh] OR<br>“Duloxetine” [Mesh] OR “NRI” [Title/Abstract] OR “reboxetine” [Title/Abstract] |
| #21     | “Monoamine Oxidase Inhibitors” [Mesh] OR “Methylphenidate” [Mesh] OR “aniracetam” [Title/Abstract] OR<br>“psychostimulant” [Title/Abstract]                                                            |
| #22     | “Drugs, Chinese Herbal” [Mesh] OR “Acupuncture Therapy” [Mesh]                                                                                                                                         |

|     |                                                                                                                                                                                              |
|-----|----------------------------------------------------------------------------------------------------------------------------------------------------------------------------------------------|
| #23 | “Psychotherapy” [Mesh] OR “Behavior Therapy” [Mesh]                                                                                                                                          |
| #24 | “Transcranial Magnetic Stimulation” [Mesh] OR “Electroconvulsive Therapy” [Mesh]                                                                                                             |
| #25 | “Mindfulness” [Mesh] OR “Music Therapy” [Mesh] OR “General Surgery” [Mesh] OR “Rehabilitation” [Mesh] OR “Social Support” [Mesh] OR “Education” [Mesh] OR “Family” [Mesh] OR “Nurses” [Mesh] |
| #26 | (#17) OR (#18) OR (#19) OR (#20) OR (#21) OR (#22) OR (#23) OR (#24) OR (#25)                                                                                                                |
| #27 | (#7) AND (#16) AND (#26)                                                                                                                                                                     |
| 232 |                                                                                                                                                                                              |

| Embase |                                                                                                                          |
|--------|--------------------------------------------------------------------------------------------------------------------------|
| #1     | ‘randomized controlled trial’/exp: ti,ab,kw                                                                              |
| #2     | ‘randomized controlled trial (topic)’/exp: ti,ab,kw                                                                      |
| #3     | random *: ti,ab,kw                                                                                                       |
| #4     | #1 OR #2 OR #3                                                                                                           |
| #5     | ‘PSD’/exp: ti,ab,kw                                                                                                      |
| #6     | ‘post-stroke depression’/exp: ti,ab,kw: ti,ab,kw                                                                         |
| #7     | ‘post-stroke depressive’/exp: ti,ab,kw                                                                                   |
| #8     | ‘depression after cerebral apoplexy’/exp: ti,ab,kw                                                                       |
| #9     | ‘depression after cerebrovascular accident’/exp: ti,ab,kw                                                                |
| #10    | ‘depression after cerebrovascular disease’/exp: ti,ab,kw                                                                 |
| #11    | ‘depression in stroke patients’/exp: ti,ab,kw                                                                            |
| #12    | ‘depression after stroke’ /exp: ti,ab,kw                                                                                 |
| #13    | #5 OR #6 OR #7 OR #8 OR #9 OR #10 OR #11 OR #12 OR                                                                       |
| #14    | ‘therapeutics’ /exp: ti,ab,kw OR ‘antidepressive Agents’ /exp: ti,ab,kw                                                  |
| #15    | ‘tricyclic’ /exp: ti,ab,kw                                                                                               |
| #16    | ‘serotonin uptake inhibitors’ /exp: ti,ab,kw                                                                             |
| #17    | ‘serotonin norepinephrine reuptake inhibitor’ /exp: ti,ab,kw                                                             |
| #18    | ‘monoamine oxidase inhibitors’ /exp: ti,ab,kw                                                                            |
| #19    | ‘fluoxetine’ /exp: ti,ab,kw OR ‘sertraline’ /exp: ti,ab,kw OR ‘paroxetine’ /exp: ti,ab,kw OR ‘citalopram’ /exp: ti,ab,kw |
| #20    | ‘Chinese Herbal’ /exp: ti,ab,kw OR ‘acupuncture’ /exp: ti,ab,kw                                                          |

|            |                                                                                                                                                                        |
|------------|------------------------------------------------------------------------------------------------------------------------------------------------------------------------|
| #21        | 'psychotherapy' /exp: ti,ab,kw OR 'behavior therapy' /exp:ti,ab,kw OR 'transcranial magnetic stimulation' /exp: ti,ab,kw OR 'electroconvulsive therapy' /exp: ti,ab,kw |
| #22        | 'mindfulness' /exp: ti,ab,kw OR 'music therapy' /exp: ti,ab,kw OR 'surgery' /exp: ti,ab,kw OR 'rehabilitation' /exp: ti,ab,kw OR 'education' /exp: ti,ab,kw            |
| #23        | (#14) OR (#15) OR (#16) OR (#17) OR (#18) OR (#19) OR (#20) OR (#21) OR (#22)                                                                                          |
| #24        | (#4) AND (#13) AND (#23)                                                                                                                                               |
| <b>318</b> |                                                                                                                                                                        |

| <b>Cochrane Library Central</b> |                                                                                                                                                                                                                       |
|---------------------------------|-----------------------------------------------------------------------------------------------------------------------------------------------------------------------------------------------------------------------|
| #1                              | PSD: ti, ab, kw OR post- stroke depression: ti, ab, kw in Trials (Word variations have been searched)                                                                                                                 |
| #2                              | depression after cerebrovascular disease: ti, ab, kw OR depression after cerebral apoplexy: ti, ab, kw in Trials (Word variations have been searched)                                                                 |
| #3                              | depression after stroke: ti, ab, kw in Trials (Word variations have been searched)                                                                                                                                    |
| #4                              | depression in stroke patients : ti, ab, kw in Trials (Word variations have been searched)                                                                                                                             |
| #5                              | (#1) OR (#2) OR (#3) OR (#4)                                                                                                                                                                                          |
| #6                              | therapeutics: ti, ab, kw OR antidepressive: ti, ab, kw OR serotonin reuptake inhibitor: ti, ab, kw OR tricyclic: ti, ab, kw OR monoamine oxidase inhibitor: ti, ab, kw in Trials (Word variations have been searched) |
| #7                              | fluoxetine: ti, ab, kw OR sertraline: ti, ab, kw OR paroxetine: ti, ab, kw OR citalopram: ti, ab, kw OR reboxetine: ti, ab, kw in Trials (Word variations have been searched)                                         |
| #8                              | trazodone: ti, ab, kw OR nortriptyline: ti, ab, kw OR escitalopram: ti, ab, kw OR psychostimulant: ti, ab, kw in Trials (Word variations have been searched)                                                          |
| #9                              | Chinese herbal medicine: ti, ab, kw OR acupuncture: ti, ab, kw OR behavior therapy: ti, ab, kw OR psychotherapy: ti, ab, kw in Trials (Word variations have been searched)                                            |
| #10                             | transcranial magnetic stimulation: ti, ab, kw OR surgery: ti, ab, kw OR electroconvulsive therapy: ti, ab, kw OR mindfulness: ti, ab, kw OR music therapy: ti, ab, kw in Trials (Word variations have been searched)  |
| #11                             | nurse: ti, ab, kw OR care: ti, ab, kw OR support: ti, ab, kw OR family: ti, ab, kw OR education: ti, ab, kw in Trials (Word variations have been searched)                                                            |
| #12                             | (#6) OR (#7) OR (#8) OR (#9) OR (#10) OR (#11)                                                                                                                                                                        |
| #13                             | (#5) AND (#12)                                                                                                                                                                                                        |
| <b>602</b>                      |                                                                                                                                                                                                                       |

### Appendix 3: References for included trials

1. Lipsey JR, Robinson RG, Pearlson GD, Rao K, Price TR. Nortriptyline treatment of post-stroke depression: a double-blind study. *Lancet*. **1**, 297-300 (1984).
2. Andersen G, Vestergaard K, Lauritzen L, General F. Original contributions effective treatment of post-stroke depression with the selective serotonin reuptake inhibitor citalopram. *Stroke*. 1994;25(6):1099-1104.
3. Gonzalez-torrecillas JL, Mendlewicz J, Lob A. Effects of early treatment of post-stroke depression on neuropsychological rehabilitation. *Int Psychogeriatr*. **7**, 547-560 (1995)
4. Kimura M, Robinson RG, Kosier JT. Treatment of cognitive impairment after post-stroke depression: A double-blind treatment trial. *Stroke*. **31**, 1482–1486 (2000).
5. Robinson RG, Schultz SK, Castillo C, Kopel T, Kosier JT, Newman RM, et al. Nortriptyline versus fluoxetine in the treatment of depression and in short-term recovery after stroke. *Am J Psychiatry*. **157**, 351–359 (2000).
6. Taragano FE, Allegri R, Vicario A, Bagnatti P, Lyketsos CG. A double blind, randomized clinical trial assessing the efficacy and safety of augmenting standard antidepressant therapy with nimodipine in the treatment of ‘vascular depression’. *Int J Geriatr Psychiatry*. **16**, 254–260 (2001).
7. Fruehwald S, Gatterbauer E, Rehak P, Baumhackl U. Early fluoxetine treatment of post-stroke depression: A three-month double-blind placebo-controlled study with an open-label long-term follow up. *J Neuro*. **250**, 347–351 (2003).
8. Kimura M, Tateno A, Robert G, Robinson M. Treatment of post-stroke generalized anxiety disorder comorbid with post-stroke depression merged analysis of nortriptyline trials. *Am J Geriatr Psychiatry*. **11**, 320–327 (2003)
9. Rampello L, Chiechio S, Nicoletti G, Alvano A, Vecchio I, Raffaele R. Prediction of the response to citalopram and reboxetine in post-stroke depressed patients. *Psychopharmacology*. **173**, 73–78 (2004).
10. Rampello L, Alvano A, Chiechio S. An evaluation of efficacy and safety of reboxetine in elderly patients affected by “retarded” post-stroke depression: A random, placebo-controlled study. *Arch Gerontol Geriatr*. **40**, 275–285 (2004).
11. Huang L. Comparison of therapeutic effects and side effects between fluoxetine hydrochloride and clomipramine in patients with vascular depression. *Chin J Clin Rehabil*. **9**, 226–228 (2005).
12. Ye LX, Wang YD, Wang H, Liang DS. Effect of Paxil and berhomine on post-stroke anxiety-depression and neurological recovery. *Chin J Clin Rehabil*. **10**, 153-155 (2006).
13. Li LT, Wang SH, Ge HY, Chen J, Yue SW, Yu M. The beneficial effects of the herbal medicine Free and Easy Wanderer Plus (FEWP) and fluoxetine on post-stroke depression. *J Altern Complement Med*. **14**, 841–846 (2008).
14. Cravello L, Caltagirone C, Spalletta G. The SNRI venlafaxine improves emotional unawareness in patients with post-stroke depression. *Hum. Psychopharmacol Clin Exp*. **24**, 331–336 (2009).
15. Karaiskos D, Tzavellas E, Spengos K, Vassilopoulou S, Paparrigopoulos T. Duloxetine versus citalopram and sertraline in the treatment of post-stroke depression, anxiety, and fatigue. *J Neuropsychiatry Clin Neurosci*. **24**,349–353 (2012).
16. Jorge RE, Robinson RG, Tateno A, Narushima K, Acion L, Moser D, et al. Repetitive transcranial magnetic stimulation as treatment of post-stroke depression: A preliminary study. **55**, 398–405 (2004).
17. Jorge RE, Moser DJ, Acion L, Robinson RG. Treatment of vascular depression using repetitive transcranial magnetic stimulation. *Arch Gen Psychiatry*. **65**, 268-276 (2008).
18. Tenev V, Robinson RG, Jorge RE. Citalopram for continuation therapy after repetitive transcranial magnetic stimulation in vascular depression. *Am J Geriatr Psychiatry*. **17**, 682–687 (2010).
19. Narushima K, McCormick L, Yamada T, Thatcher R, Robinson RG. Subgenual cingulate theta activity predicts treatment response of repetitive transcranial magnetic stimulation in participants with vascular depression. *J Neuropsychiatry Clin Neurosci*. **22**, 75-84 (2010).
20. Seo YG, Chang MC. The Effects of 10-Hz Repetitive Transcranial Magnetic Stimulation on Depression in Chronic Stroke Patients. [published online ahead of print October 18, 2016]. *Brain Stimul*. [http://www.brainstimjrn.com/article/S1935-861X\(16\)30270-4/abstract](http://www.brainstimjrn.com/article/S1935-861X(16)30270-4/abstract). Accessed September 9, 2016.
21. Feng SZ, Zhang MY, Dai AH. Impacts of rehabilitative therapy on post-stroke depression and the ability of daily life. *Chin J Clin Rehabil*. **9**, 154-155 (2005).
22. Williams LS, Kroenke K, Bakas T, Plue LD, Brizendine E, Hendrie H. Care Management of Poststroke Depression: A Randomized, Controlled Trial. *Stroke*. **38**, 998–1003 (2007).

23. Mitchell PH. Brief psychosocial-behavioral intervention with antidepressant reduces poststroke depression significantly more than usual care with antidepressant: living well with stroke: randomized, controlled trial. *Stroke*. **40**, 3073–3078 (2009).
24. Wiart L, Petit H, Joseph PA, Mazaux JM, Barat M. Fluoxetine in early post-stroke depression: a double-blind placebo-controlled study. *Stroke*. **31**, 1829–32 (2000).
25. Murray V, Von Arbin M, Bartfai A, Berggren A, Landtblom A, Lundmark J, Martensson B. Double-blind comparison of sertraline and placebo in stroke patients with minor depression and less severe major depression. *Journal of Clinical Psychiatry*. **66**, 708-716 (2005)

**Appendix 4: Description of included studies, outcomes**

**Table 1. Study characteristic**

| study         | Inclusion criteria                                                                                      | Exclusion criteria                                  |                                                                                                 |                                                                                                  |                                           | profile of prior antidepressant therapy                         |
|---------------|---------------------------------------------------------------------------------------------------------|-----------------------------------------------------|-------------------------------------------------------------------------------------------------|--------------------------------------------------------------------------------------------------|-------------------------------------------|-----------------------------------------------------------------|
|               |                                                                                                         | diseases limiting verbal comprehension <sup>a</sup> | psychiatric illness or substance abuse                                                          | CNS diseases                                                                                     | others                                    |                                                                 |
| Lipsey 1984   | thromboembolic stroke or intracerebral hemorrhage; moderate or severe depression; with informed consent | severe comprehension deficit                        | -                                                                                               | -                                                                                                | medical contraindication to nortriptyline | only included patients never being treated with antidepressants |
| Andersen 1994 | acute stroke with depression                                                                            | decreased consciousness; aphasia; dementia          | history of psychiatric illness (except depression more than 1 year earlier)                     | SAH; Binswanger's disease; previous degenerative or expansive neurological diseases <sup>b</sup> | -                                         | exclude current antidepressant treatment                        |
| Gonzalez 1995 | unilateral lesion documented by CT scan and capable of compliance were included. with informed consent. | aphasia >2b/3 according to the Goodglass criteria   | alcoholism, drug abuse, any pathological condition capable of resembling a depressive condition | -                                                                                                | -                                         | exclude antidepressant treatment in the 6 months before stroke  |



|                |                                                                                                                                                                                                        |                                                                             |                                                                                              |                                                                                     |                                                                                  |                                                                                               |
|----------------|--------------------------------------------------------------------------------------------------------------------------------------------------------------------------------------------------------|-----------------------------------------------------------------------------|----------------------------------------------------------------------------------------------|-------------------------------------------------------------------------------------|----------------------------------------------------------------------------------|-----------------------------------------------------------------------------------------------|
| Robinson 2000  | acute stroke within 6 months of the onset of the study and age 18–85                                                                                                                                   | severe comprehension deficit                                                | -                                                                                            | head injury, prior or other brain disease except prior stroke                       | significant medical illness                                                      | patients who taking antidepressants were required to stop the therapy before the study (N=3). |
| Kimura 2000    | acute thromboembolic or intracerebral hemorrhagic infarction who were identified as depressed                                                                                                          | decreased consciousness; aphasia; dementia                                  | -                                                                                            | -                                                                                   | -                                                                                | -                                                                                             |
| Taragano 2001  | With vascular depression , and met DSM-IV criteria for major depressive episode                                                                                                                        | MMSE<24                                                                     | -                                                                                            | -                                                                                   | too ill medically                                                                | -                                                                                             |
| Fruehwald 2003 | thromboembolic stroke or intracerebral hemorrhage were verified by CT. moderate or severe depression, as measured by a HAMD>15                                                                         | more than mild communication deficit; MMSE<20                               | -                                                                                            | previous degenerative or expansive neurological diseases                            | -                                                                                | -                                                                                             |
| Kimura 2003    | acute thromboembolic or intracerebral hemorrhagic infarction, and identified as depressed                                                                                                              | decreased consciousness; aphasia; dementia                                  | -                                                                                            | -                                                                                   | -                                                                                | -                                                                                             |
| Rampello 2003  | presence of a recent (<12 months) single ischemic or hemorrhagic stroke, which was documented by CT or MRI; presence of major or minor depression, according to DSM IV criteria, with HDRS>20, BDI> 15 | decreased consciousness; severe aphasia, severe cognitive deficit(MMSE <22) | history of psychiatric illness (except depression for more than 1 year); chronic alcoholism, | previous degenerative or expansive neurological diseases, SAH, Binswanger’s disease | respiratory complications; serious heart diseases; under anticoagulant treatment | lack of antidepressant treatment within 30 days prior to this study                           |

|                |                                                                                                                                                                                                                          |                                                            |                                                                             |                                                                                  |                                                                                                    |                                                                     |
|----------------|--------------------------------------------------------------------------------------------------------------------------------------------------------------------------------------------------------------------------|------------------------------------------------------------|-----------------------------------------------------------------------------|----------------------------------------------------------------------------------|----------------------------------------------------------------------------------------------------|---------------------------------------------------------------------|
| Rampello 2004  | presence of a recent (<12 months) single ischemic or hemorrhagic stroke, (documented by CT or MRI); presence of major or minor depression, according to DSM IV criteria, with HDRS>20 and BDI>15; with informed consent. | severe aphasia, severe cognitive deficit                   | history of psychiatric illness (other than depression); chronic alcoholism. | previous degenerative or expansive neurologic disease, SAH, Binswanger's disease | -                                                                                                  | lack of antidepressant treatment within 2 weeks prior to this study |
| Huang 2005     | with diagnosis of vascular depression; less than 70 years old                                                                                                                                                            | decreased consciousness; dementia; severe mental disorders | history of depression                                                       | trauma, tumor, inflammation or demyelination in brain                            | severe impairment in cardiac function, hepatic function or renal function; history of drug allergy | -                                                                   |
| Ye 2006        | post-stroke anxiety and depression, with HAMD-24>21 and HAMA-14>14                                                                                                                                                       | decreased consciousness; understanding problems;           | -                                                                           | -                                                                                | without stable life signs                                                                          | -                                                                   |
| Li 2008        | presence of a recent (<6 weeks) single ischemic or hemorrhagic stroke, documented by CT or MRI; presence of major or minor depression, with a HAMD>20                                                                    | severe aphasia; MMSE<23                                    | a history of psychiatric illness other than depression; chronic alcoholism  | epilepsy                                                                         | abnormal thyroid function                                                                          | lack of before the enrolment within 2 weeks prior to this study     |
| Cravello 2009  | first-ever stroke diagnosis within the last 12 months and diagnosis of post-stroke major depressive-like episode.                                                                                                        | severe cognitive impairment (MMSE<12)                      | history of psychiatric disorders, within 5 years before the stroke          | stroke history; degenerative or expansive neurological diseases                  | atherosclerotic disease, major medical illnesses                                                   | -                                                                   |
| Dimitrios 2012 | diagnosis of the first-ever stroke within the last 12 months, based on clinical history, physical examination, and findings of brain MRI; Diagnosis of PSD, according to DSM-IV.                                         | dementia; Severe cognitive impairment(MMSE<24)             | history of a major psychiatric disorder within 5 years before the stroke.   | stroke history; degenerative or expansive neurological diseases                  | atherosclerotic disease or a history of angioplasty or bypass surgery; major medical illness       | -                                                                   |

|                |                                                                                                                                                                                                                                                                             |                                                                       |                                                                                                      |                                                                             |                                                                                                              |                                                                                                                                                |
|----------------|-----------------------------------------------------------------------------------------------------------------------------------------------------------------------------------------------------------------------------------------------------------------------------|-----------------------------------------------------------------------|------------------------------------------------------------------------------------------------------|-----------------------------------------------------------------------------|--------------------------------------------------------------------------------------------------------------|------------------------------------------------------------------------------------------------------------------------------------------------|
| Jorge 2004     | cortical or subcortical ischemic lesions of the right hemisphere and subcortical lesions or posterior cortical lesions of the left hemisphere.                                                                                                                              | aphasia or with language comprehension deficits; MMSE<23              | actively suicidal; active psychosis; bipolar course; alcohol or drug abuse during the past 12 months | degenerative neurological diseases ; major head trauma, epilepsy            | severe systemic disease; ongoing neoplasia; contraindications for rTMS <sup>c</sup>                          | patients were unresponsive to antidepressants                                                                                                  |
| Jorge 2008     | major depressive disorder (as diagnosed by DSM-IV criteria) at age 50 years or older, a history of subcortical stroke, and/or at least 3 of the following cardiovascular risk factors: arterial hypertension, diabetes mellitus, obesity, hyperlipidemia, and smoking       | dementia                                                              | suicidal; active psychosis; comorbid alcohol or other drug abuse within 2 years before the study     | degenerative neurological diseases; head trauma, epilepsy                   | severe heart or respiratory failure; renal or hepatic failure; ongoing neoplasia; contraindications for rTMS | Patients were unresponsive to antidepressants; patients who taking antidepressants were required to stop the therapy before initiation of rTMS |
| Narushima 2010 | age between 50 and 90 years old; major depressive disorder (as diagnosed by the DSM-IV-TR) with HAMD>14; a history of stroke or at least three of the following cardiovascular risk factors: arterial hypertension, diabetes mellitus, obesity, hyperlipidemia, and smoking | severe aphasia; dementia                                              | suicidal thought, plan, or delusion; substance abuse within the prior 2 years;                       | degenerative neurological diseases; prior seizure or traumatic brain injury | life-threatening physical illness; contraindications for rTMS                                                | patients were unresponsive to antidepressants; patients who taking antidepressants were required to stop the therapy before initiation of rTMS |
| Tenev 2010     | with onset of major depression at age 50 or older, with a history of subcortical stroke or at least 3 of the following cardiovascular risk factors: arterial hypertension, diabetes mellitus, obesity, hyperlipidemia, and smoking                                          | -                                                                     | psychotic depression                                                                                 | -                                                                           | severe coexistent medical illness                                                                            | patients who taking antidepressants were required to stop the therapy before initiation of rTMS                                                |
| Seo 2016       | history of stroke $\geq$ 6 months; aged between 21 and 80 years; the presence of depression (BDI>12 and HAMD-17>6)                                                                                                                                                          | aphasia; severe cognitive dysfunction                                 | depression before stroke onset;                                                                      | -                                                                           | serious medical complication; contraindications for rTMS                                                     | patients with medication history of antidepressants before stroke onset were excluded                                                          |
| Feng 2004      | stroke patients with depression                                                                                                                                                                                                                                             | decreased consciousness; aphasia; cognitive disorder; mental disorder | -                                                                                                    | previous stroke history                                                     | serious condition                                                                                            | -                                                                                                                                              |

|               |                                                                                                                                                                                               |                               |                                                      |                    |                                         |                                                                                                                   |
|---------------|-----------------------------------------------------------------------------------------------------------------------------------------------------------------------------------------------|-------------------------------|------------------------------------------------------|--------------------|-----------------------------------------|-------------------------------------------------------------------------------------------------------------------|
| Williams 2007 | could speak and understand English, had a telephone, and who had a life expectancy of at least 6 months                                                                                       | aphasia; dementia;<br>MMSE<23 | active psychosis;<br>suicidality; substance<br>abuse | hemorrhagic stroke | women pregnant at the<br>time of stroke | patients were not excluded for<br>prior antidepressant treatment<br>either before or at the time of<br>the stroke |
| Mitchell 2009 | within 4 months of an ischemic stroke, verified by CT or MRI,<br>who screened positive for depressive symptoms, and whose<br>diagnosis of clinical depression was verified by DSM IV criteria | -                             | active psychosis; drug<br>abuse                      | -                  | -                                       | patients were not excluded for<br>prior or current antidepressant<br>treatment                                    |

<sup>a</sup>Diseases limiting verbal comprehension including decreased consciousness, aphasia, dementia, and cognitive disorder.

<sup>b</sup>Degenerative neurological diseases including Parkinson disease and Alzheimer disease; expansive neurological diseases including multiple sclerosis, tumor, hydrocephalus, and amyotrophic lateral sclerosis.

<sup>c</sup>Contraindications for rTMS including epileptic seizure, the presence of metal in the skull, pacemaker placement, frontal cortex lesion or hemorrhagic stroke (to avoid rTMS induced seizure).

HAMD= Hamilton Depression Rating Scale(or HRSD);

DSM= Diagnostic and Statistical Manual of Mental Disorders

CT=computed tomography

MRI=magnetic resonance imaging

SAH=subarachnoid hemorrhage

TIA=transient ischemic attack

TCD=total cumulative dose

MMSE= Mini-mental State examination;

BDI=Beck Depression Inventory

**Table 2. Treatment characteristic**

| study          | duration      | intervention/control group<br>(N and maximum daily dose) |                                 |                           |
|----------------|---------------|----------------------------------------------------------|---------------------------------|---------------------------|
|                |               |                                                          |                                 |                           |
| Lipsey 1984    | 6 weeks       | Nortriptyline<br>(N=14;100mg/d)                          | Placebo<br>(N=20)               | -                         |
| Andersen 1994  | 6 weeks       | Citalopram<br>(N=33;20mg/d)                              | Placebo<br>(N=33)               | -                         |
| Gonzalez 1995  | 6 weeks       | Fluoxetine<br>(N=26;20mg/d)                              | Nortriptyline<br>(N=11;75mg/d)  | Placebo<br>(N=11;100mg/d) |
| Robinson 2000  | 12 weeks      | Fluoxetine<br>(N=23;40mg/d)                              | Nortriptyline<br>(N=16,100mg/d) | Placebo<br>(N=17)         |
| Kimura 2000    | 6 or 12 weeks | Nortriptyline<br>(N=21;100mg/d)                          | Placebo<br>(N=26)               | -                         |
| Taragano 2001  | 60 days       | Nimodipine + antidepressants<br>(N=40,90mg/d)            | SSRI (N=44)                     | -                         |
| Fruehwald 2003 | 12 weeks      | Fluoxetine<br>(N=28; 20mg/d);                            | Placebo<br>(N=26)               | -                         |
| Kimura 2003    | 6 or 12 weeks | Nortriptyline<br>(N=13;100mg/d)                          | Placebo<br>(N=14)               | -                         |

|                         |          |                                                               |                                |                              |
|-------------------------|----------|---------------------------------------------------------------|--------------------------------|------------------------------|
| Rampello 2003           | 16 weeks | Citalopram<br>(N=37;20mg/d)                                   | Reboxetine<br>(N=37;4mg/d)     | -                            |
| Rampello 2004           | 16 weeks | Reboxetine<br>(N=16;4mg/d);                                   | Placebo<br>(N=15)              | -                            |
| Huang 2005              | 12 weeks | Fluoxetine<br>(N=30;20mg/d)                                   | Clomipramine<br>(N=30;750mg/d) | -                            |
| Ye 2006                 | 12 weeks | Paroxetine<br>(N=29;20mg/d)                                   | Imipramine<br>(N=27;150mg/d)   | Control<br>(n=27)            |
| Li 2008                 | 8 weeks  | FEWP<br>(N=60;36g/d)                                          | Fluoxetine<br>(N=60;40mg/d)    | Placebo<br>(N=30;36g/d)      |
| Cravello 2009           | 8 weeks  | Fluoxetine<br>(N=25;40mg/d)                                   | Venlafaxine (N=25;150mg/d)     | -                            |
| Dimitrios 2012          | 3 months | Duloxetine<br>(N=20;120mg/d)                                  | Citalopram<br>(N=20;40mg/d)    | Sertraline<br>(N=20;200mg/d) |
| Jorge 2004              | 2 weeks  | Active rTMS<br>(N=10;TCD=12K <sup>a</sup> )                   | Sham rTMS<br>(N=10)            | -                            |
| Jorge 2008 <sup>c</sup> | 3 weeks  | Active rTMS<br>(N=15;TCD=12K)<br>(N=33;TCD=18K <sup>b</sup> ) | Sham rTMS<br>(N=15)<br>(N=29)  | -                            |
| Narushima 2010          | 2 weeks  | Active rTMS<br>(N=43;TCD=12k/18k)                             | Sham rTMS<br>(N=22)            | -                            |
| Tenev 2010              | 2 weeks  | Active rTMS<br>(N=33;TCD=18k)                                 | Sham rTMS<br>(N=29)            | -                            |
| Seo 2016                | 2 weeks  | Active rTMS<br>(N=12;TCD=12K)                                 | Sham rTMS<br>(N=12)            | -                            |









3-2 response of all treatments

|                               | SSRI     |    | TCA      |    | N+A      |    | TCM      |    | CONTROL  |    | rTMS     |    | P+A      |    |
|-------------------------------|----------|----|----------|----|----------|----|----------|----|----------|----|----------|----|----------|----|
|                               | Response | n  | Response | n  | Response | n  | response | n  | Response | n  | response | n  | response | n  |
| Robinson 2000                 | 2        | 23 | 10       | 16 |          |    |          |    | 4        | 17 |          |    |          |    |
| Kimura 2000                   |          |    | 16       | 21 |          |    |          |    | 8        | 26 |          |    |          |    |
| Taragano 2001                 | 25       | 44 |          |    | 27       | 40 |          |    |          |    |          |    |          |    |
| Fruehwald 2002                | 18       | 26 |          |    |          |    |          |    | 18       | 24 |          |    |          |    |
| Kimura 2003                   |          |    | 9        | 13 |          |    |          |    | 3        | 14 |          |    |          |    |
| Huang 2005                    | 25       | 30 | 25       | 30 |          |    |          |    |          |    |          |    |          |    |
| Ye 2006                       | 20       | 29 | 18       | 27 |          |    |          |    | 7        | 27 |          |    |          |    |
| Li 2008                       | 38       | 58 |          |    |          |    | 36       | 60 | 6        | 28 |          |    |          |    |
| Jorge 2004                    |          |    |          |    |          |    |          |    | 0        | 10 | 3        | 20 |          |    |
| Jorge 2008-(12K) <sup>a</sup> |          |    |          |    |          |    |          |    | 1        | 15 | 5        | 15 |          |    |
| Jorge 2008-(18K) <sup>a</sup> |          |    |          |    |          |    |          |    | 2        | 29 | 13       | 33 |          |    |
| Narushima 2010                |          |    |          |    |          |    |          |    | 1        | 11 | 14       | 32 |          |    |
| Tenev 2010                    |          |    |          |    |          |    |          |    | 2        | 29 | 13       | 33 |          |    |
| Williams 2006                 |          |    |          |    |          |    |          |    | 28       | 93 |          |    | 45       | 89 |

<sup>a</sup>The author divided PSD patients into 2 group according to the total cumulative dose(TCD) the active groups accepted.

SSRI= selective serotonin reuptake inhibitor

TCA= tricyclic antidepressant

N+A= nimodipine plus antidepressants

TCM= traditional Chinese medicine

rTMS= Repetitive Transcranial Magnetic Stimulation

P+A= psychotherapy plus antidepressants

### 3-3 remission of all treatments

|                                   | SSRI      |    | TCA       |    | N+A       |    | CONTROL   |    | rTMS      |    | P+A       |    |
|-----------------------------------|-----------|----|-----------|----|-----------|----|-----------|----|-----------|----|-----------|----|
|                                   | remission | n  | remission | n  | remission | n  | remission | n  | remission | n  | remission | n  |
| Andersen 1994                     | 16        | 27 |           |    |           |    | 9         | 32 |           |    |           |    |
| Taragano 2001                     | 11        | 44 |           |    | 18        | 40 |           |    |           |    |           |    |
| Ye 2006                           | 7         | 29 | 6         | 27 |           |    | 2         | 27 |           |    |           |    |
| Jorge 2004                        |           |    |           |    |           |    | 0         | 10 | 1         | 10 |           |    |
| Jorge 2008-<br>(12K) <sup>a</sup> |           |    |           |    |           |    | 1         | 15 | 2         | 15 |           |    |
| Jorge 2008-<br>(18K) <sup>a</sup> |           |    |           |    |           |    | 1         | 29 | 9         | 33 |           |    |
| Narushima 2010                    |           |    |           |    |           |    | 0         | 11 | 11        | 32 |           |    |
| Williams 2006                     |           |    |           |    |           |    | 21        | 93 |           |    | 35        | 89 |
| Mitchell 2009                     | 10        | 53 |           |    |           |    |           |    |           |    | 21        | 45 |

<sup>a</sup>The author divided PSD patients into 2 group according to the total cumulative dose(TCD) the active groups accepted.

SSRI= selective serotonin reuptake inhibitor

TCA= tricyclic antidepressant

N+A= nimodipine plus antidepressants

rTMS= Repetitive Transcranial Magnetic Stimulation

P+A= psychotherapy plus antidepressants

3-4 reduction of HAMD score between pre- and post- treatment of antidepressants

|                  | SSRI       |       |    |            |       |    |            |           |          |            |       |    | SNRI       |       |    |             |       |    | TCA        |       |    |              |       |    |               |           |          | NRI         |       |    | TCM                         |       |    | CONTROL |       |    |        |          |          |
|------------------|------------|-------|----|------------|-------|----|------------|-----------|----------|------------|-------|----|------------|-------|----|-------------|-------|----|------------|-------|----|--------------|-------|----|---------------|-----------|----------|-------------|-------|----|-----------------------------|-------|----|---------|-------|----|--------|----------|----------|
|                  | sertraline |       |    | sertraline |       |    | fluoxetine |           |          | paroxetine |       |    | duloxetine |       |    | venlafaxine |       |    | imipramine |       |    | clomipramine |       |    | nortriptyline |           |          | reboxetione |       |    | Free and Easy Wanderer Plus |       |    | control |       |    |        |          |          |
|                  | n          | me an | sd | n          | me an | sd | n          | me an     | sd       | n          | me an | sd | n          | me an | sd | n           | me an | sd | n          | me an | sd | n            | me an | sd | n             | me an     | sd       | n           | me an | sd | n                           | me an | sd | n       | me an | sd | n      | me an    | sd       |
| Lipsey<br>1984   |            |       |    |            |       |    |            |           |          |            |       |    |            |       |    |             |       |    |            |       |    |              |       |    |               |           |          |             |       |    |                             |       |    |         |       |    | 1<br>5 | 6.3<br>9 | 1.0<br>3 |
| Andersen<br>1994 | 3<br>3     | 8     | 6  |            |       |    |            |           |          |            |       |    |            |       |    |             |       |    |            |       |    |              |       |    |               |           |          |             |       |    |                             |       |    |         |       |    | 3<br>3 | 4.8      | 4.6      |
| Gonzalez<br>1995 |            |       |    |            |       |    | 2<br>5     | 16.<br>37 | 7.<br>9  |            |       |    |            |       |    |             |       |    |            |       |    |              |       |    | 1<br>0        | 14.<br>68 | 0.<br>35 |             |       |    |                             |       |    |         |       |    | 1<br>0 | 2.1<br>1 | 0.3<br>6 |
| Robinson<br>2000 |            |       |    |            |       |    | 1<br>4     | 1.9       | 6.<br>64 |            |       |    |            |       |    |             |       |    |            |       |    |              |       |    | 1<br>3        | 13.<br>5  | 7.<br>47 |             |       |    |                             |       |    |         |       |    | 1<br>3 | 5.3      | 5.6      |
| Kimura<br>2000   |            |       |    |            |       |    |            |           |          |            |       |    |            |       |    |             |       |    |            |       |    |              |       |    | 1<br>8        | 12.<br>05 | 5.<br>53 |             |       |    |                             |       |    |         |       |    | 2<br>6 | 6.8<br>4 | 6.7<br>6 |





|         |    |    |  |  |  |  |  |  |  |  |    |    |   |    |
|---------|----|----|--|--|--|--|--|--|--|--|----|----|---|----|
| Li 2008 | 38 | 58 |  |  |  |  |  |  |  |  | 36 | 60 | 6 | 28 |
|---------|----|----|--|--|--|--|--|--|--|--|----|----|---|----|

SSRI= selective serotonin reuptake inhibitor

TCA= tricyclic antidepressant

TCM= traditional Chinese medicine

### 3-6 remission of antidepressants

|               | SSRI       |    |            |    | TCA        |    | CONTROL   |    |
|---------------|------------|----|------------|----|------------|----|-----------|----|
|               | citalopram |    | paroxetine |    | imipramine |    | control   |    |
|               | remission  | n  | remission  | n  | remission  | n  | remission | n  |
| Andersen 1994 | 16         | 27 |            |    |            |    | 9         | 32 |
| Ye 2006       |            |    | 7          | 29 | 6          | 27 | 2         | 27 |

SSRI= selective serotonin reuptake inhibitor

TCA= tricyclic antidepressant

**Table 4. Overview of treatments in the included trials and in the network meta-analysis**

| intervention groups                           | Trial group/arms                                                                                                                                                                                                                    |
|-----------------------------------------------|-------------------------------------------------------------------------------------------------------------------------------------------------------------------------------------------------------------------------------------|
| TCA, tricyclic antidepressants                | 7 arms in total<br>5 nortriptyline<br>1 imipramine<br>1 clomipramine                                                                                                                                                                |
| SSRI, selective serotonin reuptake inhibitors | 14 separate groups in trials, after pooling of 2 arms in a study with 2 SSRI, 13 arms in analyses<br>4 citalopram (1 pooled with sertraline, 2 from 1 trial <sup>a</sup> )<br>1 sertraline (pooled with citalopram)<br>6 fluoxetine |

|                                                  |                                                                                              |
|--------------------------------------------------|----------------------------------------------------------------------------------------------|
|                                                  | 1 paroxetine<br>2 mixed use of SSRIs                                                         |
| SNRI, serotonin-noradrenaline reuptake inhibitor | 2 arms in total<br>1 duloxetine<br>1 venlafaxine                                             |
| NRI, noradrenaline reuptake inhibitor            | 3 arms in total<br>3 reboxetine (2 from 1 trial <sup>a</sup> )                               |
| TCM, Chinese traditional medicine                | 1 arms in total<br>1 Free and Easy Wanderer Plus                                             |
| rTMS therapy                                     | 6 arms in total (2 from 1 trial <sup>b</sup> )<br>3 TCD=12k<br>2 TCD=18k<br>1 TCD=12k or 18k |
| Psychotherapy                                    | 1 arm in total                                                                               |
| Nimodipine plus antidepressants                  | 1 arms in total<br>1 nimodipine plus antidepressants                                         |
| Psychotherapy plus antidepressants               | 2 arms in total<br>2 psychotherapy plus antidepressants                                      |

<sup>a</sup>In trial of “Rampello 2003”, the author divided PSD patients into “retarded” and “anxious” groups, and in each group the patients were randomized into citalopram and reboxetine subgroups.

<sup>b</sup>In trial of “Jorge 2008”, the author divided PSD patients into 2 group according to the total cumulative dose(TCD) the active groups accepted.

**Table 5. Adverse events of individual studies**

| study | Adverse events<br>(Showed as events n(%)) |         |         |
|-------|-------------------------------------------|---------|---------|
|       | Group 1                                   | Group 2 | Group 3 |
|       |                                           |         |         |



|                |                                                                                                                                                                       |                                                                                                                                                                                       |                                                                                     |
|----------------|-----------------------------------------------------------------------------------------------------------------------------------------------------------------------|---------------------------------------------------------------------------------------------------------------------------------------------------------------------------------------|-------------------------------------------------------------------------------------|
| Lipsey 1984    | nortriptyline: dizziness 1; delirious 3; sedated 1; syncopal 1                                                                                                        | placebo: mania 1; refused interview or unfollowed 3; death 2(heart-failure 1; ICH 1); dizziness 1                                                                                     |                                                                                     |
| Andersen 1994  | citalopram: new stroke 3(thromboembolic 1; ICH 1; TIA 1); epilepsy 2; rash 1; death 2(both not because of heart-failure)                                              | placebo: death 2(heart-failure) ; heart-failure 1; acute myocardial infarction 1; new stroke 2(thromboembolic 1;TIA 1); rash 1                                                        |                                                                                     |
| Gonzalez 1995  | fluoxetine:1 drop out because of side effects;                                                                                                                        | nortriptyline:1 drop out because of side effects                                                                                                                                      | control: unfollowed                                                                 |
| Robinson 2000  | fluoxetine: gastrointestinal symptoms 3; refused treatment 6;                                                                                                         | nortriptyline: medical deterioration 2; refused treatment 1                                                                                                                           | placebo: death 1(pulmonary embolus 1); medical deterioration 1; refused treatment 2 |
| Kimura 2000    | NR                                                                                                                                                                    |                                                                                                                                                                                       |                                                                                     |
| Taragano 2001  | nimodipine: hypotention 7; nausea 2; headache 2; dizziness 4;retarded ejaculation 1; epigastric pains 3; bradycardia 1; vertigo 1; insomnia 1; diarrhea 1; any one 21 | control: hypotention 1; nausea 5; headache 4; dizziness 1; dry mouth 3; retarded ejaculation 2; bradycardia 1; anorexia 2; phobia 1; bronchitis 1; any one 18                         |                                                                                     |
| Fruehwald 2003 | fluoxetine: death 1; pulmonary artery embolism 1                                                                                                                      | placebo: medical deterioration 1(suicidal 1); dermatological disease 1                                                                                                                |                                                                                     |
| Kimura 2003    | NR                                                                                                                                                                    |                                                                                                                                                                                       |                                                                                     |
| Rampello 2003  | citalopram: nausea (3%), vomiting (2%), asthenia and fatigability (4%), opening insomnia (18%), weight increase (12%), and reduction of sexual activity (7%).         | reboxetine: dry mouth (19%), constipation (16%), hyperperspiration (16%), drowsiness (5%), urinary wavering or urinary retention (4%), hypotension (7%), and sinusal tachycardia (6%) |                                                                                     |

|                |                                                                                                                                                                                                       |                                                                                                                                                                         |                                                                                                       |
|----------------|-------------------------------------------------------------------------------------------------------------------------------------------------------------------------------------------------------|-------------------------------------------------------------------------------------------------------------------------------------------------------------------------|-------------------------------------------------------------------------------------------------------|
| Rampello 2004  | reboxetine: dry mouth (22%), constipation (18%), hyperperspiration (16%), insomnia (4%), drowsiness (3%), urinary wavering or urinary retention (4%), hypotension (8%), and sinusal tachycardia (7%). | placebo: dry mouth (19%), constipation (15%), hyperperspiration (12%), insomnia (5%), drowsiness (5%), hypotension (2%), and sinusal tachycardia (1%).                  |                                                                                                       |
| Huang 2005     | fluoxetine: 8 patients (27%) had adverse events, and 2 of them might be linked to the medication (Nausea, thirsty)                                                                                    | clomipramine: 13 patients (43%) had adverse events, 10 of them might be linked to the medication (thirsty, constipation, voiding dysfunction, dizziness and excitation) |                                                                                                       |
| Ye 2006        | paroxetine: unfollowed 1; Nausea 2;                                                                                                                                                                   | imipramine: refused treatment 3 (because of xerostomia, constipation, blurred vision, cardiovascular side effects)                                                      | control: death 1 (ICH); unfollowed 2                                                                  |
| Li 2008        | TCM: 2 Nausea;                                                                                                                                                                                        | fluoxetine: Nausea 6; insomnia 4; second stroke 2                                                                                                                       | placebo: 3 Nausea; 2 insomnia; 2 aggravated symptoms of depression                                    |
| Cravello 2009  | fluoxetine: insomnia; Nausea, fatigability, cephalalgia, and dizziness (all events were mild)                                                                                                         | venlafaxine: headache, insomnia, dry mouth, agitation, sweating, and urinary retention; blood pressure increase (all events were mild)                                  |                                                                                                       |
| Dimitrios 2012 | duloxetine: Nausea 3 (15%); somnolence 3 (15%); insomnia 1 (5%); dizziness 2 (10%); dry mouth 2 (10%); headache 2 (10%)                                                                               | citalopram: Nausea 4 (20%); somnolence 4 (20%); dry mouth 2 (10%); diarrhea 2 (10%);                                                                                    | sertraline: Nausea 5 (25%); somnolence 3 (15%); insomnia 4 (20%); dry mouth 3 (15%); diarrhea 4 (20%) |

|                |                                                                                                                                                                                                                                                                                                                                                                               |                                                                                                                            |  |
|----------------|-------------------------------------------------------------------------------------------------------------------------------------------------------------------------------------------------------------------------------------------------------------------------------------------------------------------------------------------------------------------------------|----------------------------------------------------------------------------------------------------------------------------|--|
| Jorge 2004     | All adverse events registered during the course of the study were categorized as mild. Transient headaches 6, local discomfort 5, exacerbation of initial insomnia 1. There were no significant differences in the frequency of adverse events between the active and the sham rTMS groups.                                                                                   |                                                                                                                            |  |
| Jorge 2008     | active-12k: local pain 1(7%); headache 5(33%); local discomfort 4(27%); anxiety 2(13%);<br>active-18k:local pain 1(3%); headache 7(21%); local discomfort 3(9%);                                                                                                                                                                                                              | sham-12k: local pain 1(7%); headache 4(27%); local discomfort 5(33%);<br>sham-18k:headache 3(10%); local discomfort 1(3%); |  |
| Narushima 2010 | NR                                                                                                                                                                                                                                                                                                                                                                            |                                                                                                                            |  |
| Tenev 2010     | NR                                                                                                                                                                                                                                                                                                                                                                            |                                                                                                                            |  |
| Seo 2016       | No adverse side effects were reported                                                                                                                                                                                                                                                                                                                                         |                                                                                                                            |  |
| Feng 2004      | NR                                                                                                                                                                                                                                                                                                                                                                            |                                                                                                                            |  |
| Williams 2007  | intervention: death 2(ICH); seizure 2; 15 (16%) of intervention group subjects had antidepressant side effects bothersome enough to change medications, and 4 subjects changed medications more than once. The most common of the 39 side effects reported by these 15 subjects was sedation (14), followed by sexual (7), gastrointestinal (6), and anxiety (4) side effects | control: death 1 (myocardial infarction); seizure 1                                                                        |  |
| Mitchell 2009  | NR                                                                                                                                                                                                                                                                                                                                                                            |                                                                                                                            |  |

rTMS= Repetitive Transcranial Magnetic Stimulation

TCM= traditional Chinese medicine

## Appendix 5: Risk of bias assessments within studies

We used an updated “Risk of bias” tool from the Cochrane Collaboration recommends. This tool addresses seven specific bias domains including methods for generating the random sequence, allocation concealment, blinding of participants and investigators, blinding of outcome assessment, incompleteness of outcome data and selective outcome reporting. Each item is adjudicated within each study and the results are represented in a risk of bias table. We considered allocation concealment adequate if the investigators responsible for patient selection were unable to suspect before allocation which treatment was next. We considered blinding of patients adequate if interventions were described as indistinguishable, or if double-dummy technique was used. We considered blinding of therapists adequate if it was explicitly mentioned in the text that therapists were blinded. We considered incomplete outcome data if it excluded at least one of the randomly assigned patients from the analysis.

Publication bias and selective might affect interventions and comparisons in different ways depending on the clinical context in the network meta-analysis. Using methodology from ecology, attempts have been made to associate the possibility of selection bias with asymmetry measures of the network. Funnel plot asymmetry can be caused by the association between sample size, heterogeneity, and the probability of publication. Sponsorships bias may reflect subtle or less subtle differences in the study designs or the conduct of a trial that only supports the preferred strategy.

(A) Risk of bias graph: review authors' judgements about each risk of bias item presented as percentages across all included studies.

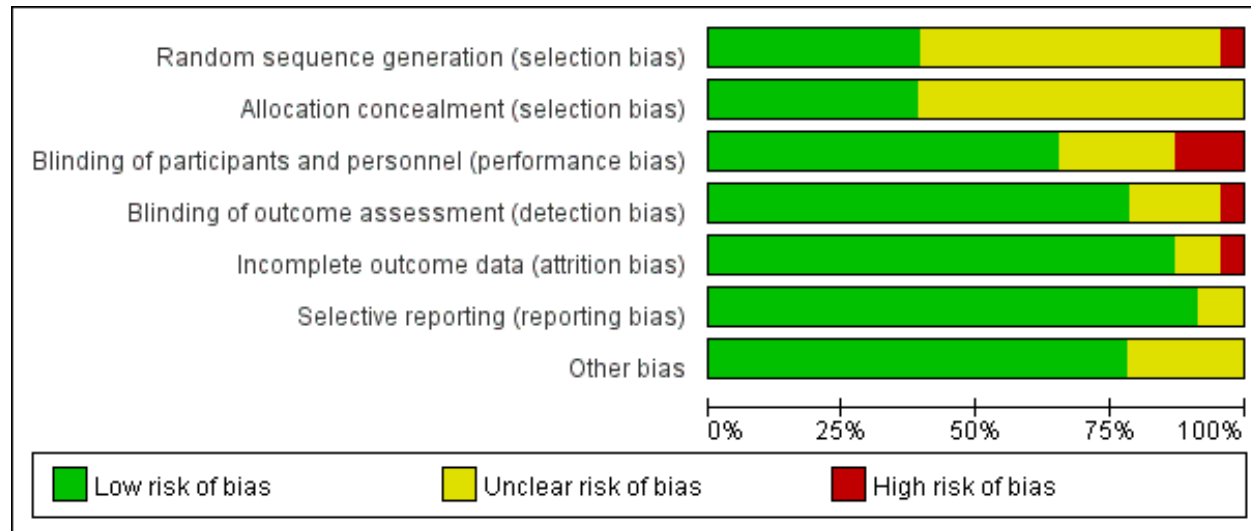

(B) Study-level risk of bias

|                |                                                           |   |   |   |   |   |
|----------------|-----------------------------------------------------------|---|---|---|---|---|
| Andersen 1994  | +                                                         | + | + | + | + | + |
| Cravello 2009  | ?                                                         | ? | + | + | + | + |
| Dimitrios 2012 | ?                                                         | ? | + | + | + | + |
| Feng 2004      | ?                                                         | ? | ? | ? | + | + |
| Fruhwald 2003  | +                                                         | + | + | + | + | + |
| Gonzalez 1995  | +                                                         | ? | ? | ? | + | + |
| Huang 2005     | ?                                                         | ? | ? | ? | + | + |
| Jorge 2004     | ?                                                         | ? | + | + | + | + |
| Jorge 2008     | ?                                                         | ? | + | + | + | + |
| Kimura 2000    | ?                                                         | ? | + | + | + | ? |
| Kimura 2003    | ?                                                         | ? | + | + | ? | ? |
| Li 2008        | +                                                         | + | + | + | + | ? |
| Lipsey 1994    | +                                                         | + | + | + | + | + |
| Mitchell 2009  | +                                                         | + | ? | + | + | + |
| Narushima 2010 | ?                                                         | ? | ? | ? | + | + |
| Rampello 2003  | +                                                         | + | + | + | + | + |
| Rampello 2004  | +                                                         | + | + | + | + | + |
| Robinson 2000  | ?                                                         | ? | + | + | + | + |
| Seo 2016       | ?                                                         | ? | + | + | + | + |
| Taragano 2001  | +                                                         | + | + | + | + | ? |
| Taney 2010     | ?                                                         | ? | + | + | + | + |
| Williams 2007  | +                                                         | + | + | + | + | ? |
| Ye 2006        | ?                                                         | ? | + | + | ? | + |
|                | Random sequence generation (selection bias)               |   |   |   |   |   |
|                | Allocation concealment (selection bias)                   |   |   |   |   |   |
|                | Blinding of participants and personnel (performance bias) |   |   |   |   |   |
|                | Blinding of outcome assessment (detection bias)           |   |   |   |   |   |
|                | Incomplete outcome data (attrition bias)                  |   |   |   |   |   |
|                | Selective reporting (reporting bias)                      |   |   |   |   |   |
|                | Other bias                                                |   |   |   |   |   |

Small-study effects assessed via comparison -adjusted network funnel plots. In this presentation, all studies are centered on the summary effect estimate of their respective comparisons [ $\mu_{XY}$  (logOR for present study)] which is represented by the vertical red line. Individual study-level effect size is represented by  $y_{iXY}$  [where X and Y are two study agents]. The green line represents linear regression of the comparison specific differences  $y_i - \mu_{XY}$  on the standard error of  $y_i$ . Outer dotted lines indicate the triangular region within which 95% of studies are expected to lie in the absence of both biases and heterogeneity ( $\logOR \pm 1.96 \times \text{standard error}$ ). Please note that this is drawn only for comparisons with 2 or more studies.

(C) Publication bias assessed via funnel plots assessed for reduction of HAMD score between individual treatment

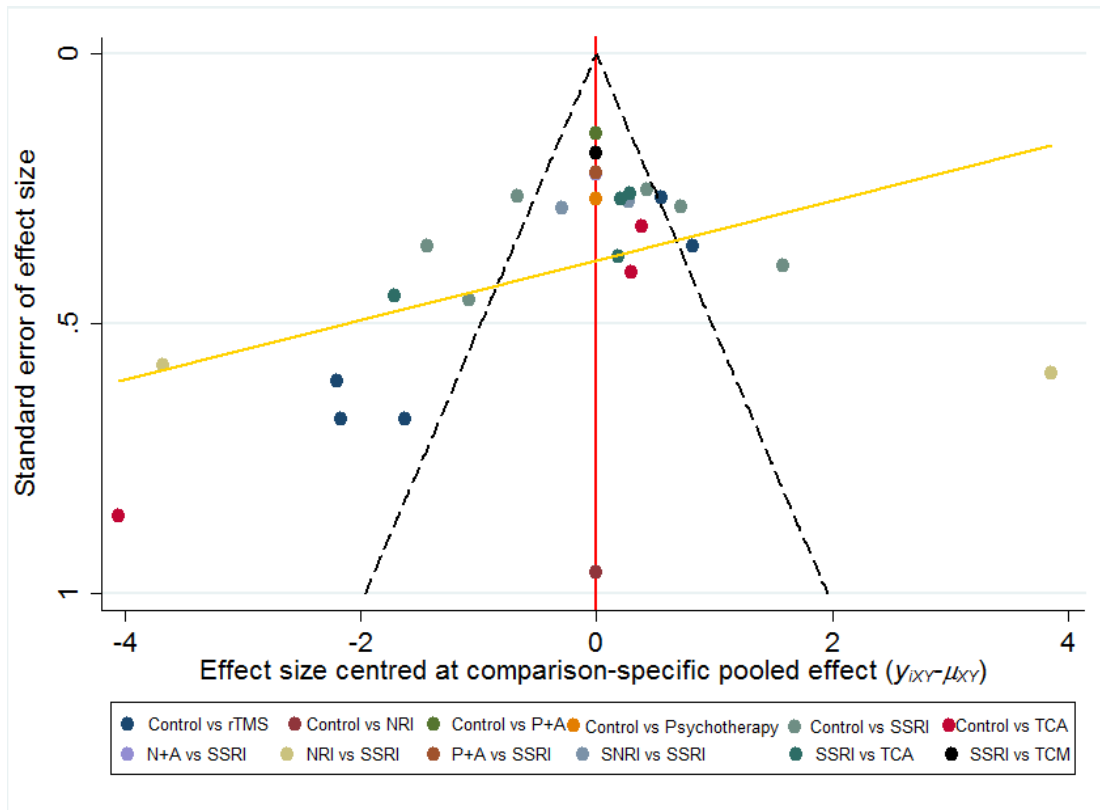

SSRI= selective serotonin reuptake inhibitor. TCA= tricyclic antidepressant. SNRI= serotonin–norepinephrine reuptake inhibitors. NRI= norepinephrine reuptake inhibitor. TCM= traditional Chinese medicine. rTMS= Repetitive Transcranial Magnetic Stimulation. P+A= psychotherapy plus antidepressants. N+A= nimodipine plus antidepressants.

(D) Publication bias assessed via funnel plots assessed for reduction of HAMD score between individual pharmacotherapy

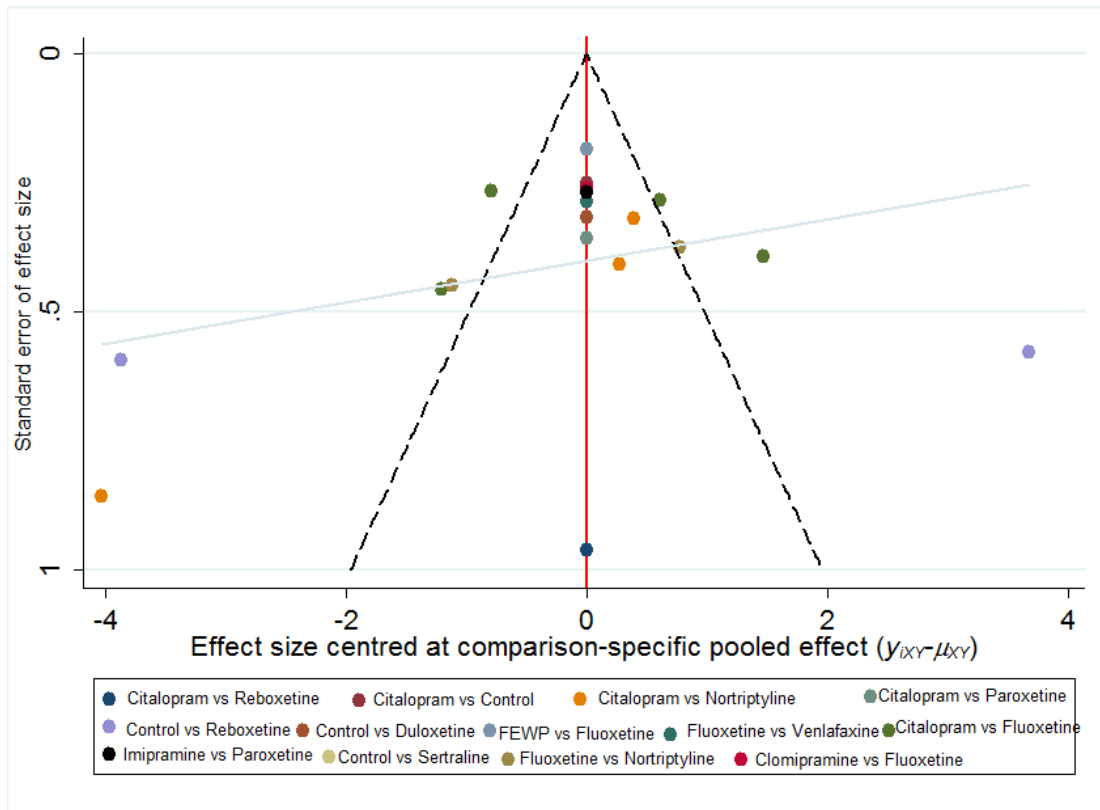

FEWP=Free and Easy Wanderer Plus (a kind of Chinese medicine; its original Chinese Name is Jia-Wei-Xiao-Yao-San)

(E) Publication bias assessed via funnel plots assessed for response rate between individual treatment

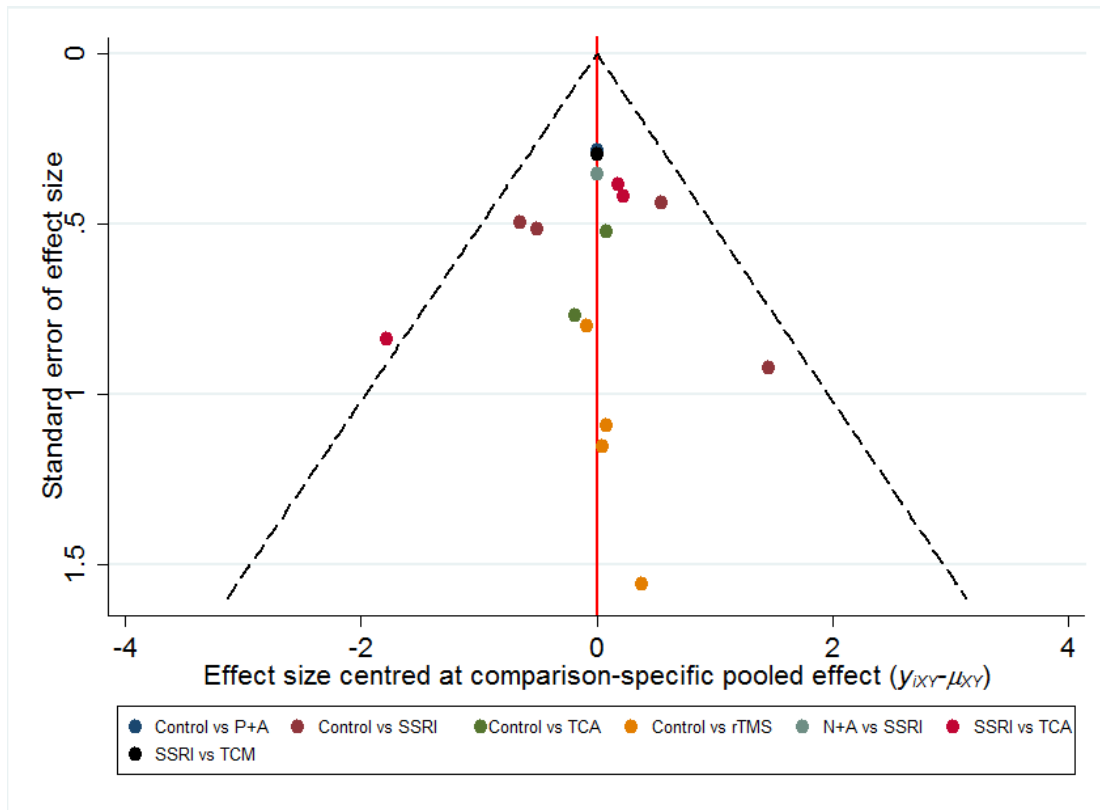

SSRI= selective serotonin reuptake inhibitor. TCA= tricyclic antidepressant. TCM= traditional Chinese medicine. rTMS= Repetitive Transcranial Magnetic Stimulation. P+A= psychotherapy plus antidepressants. N+A= nimodipine plus antidepressants.

(F) Publication bias assessed via funnel plots assessed for remission rate between individual treatment



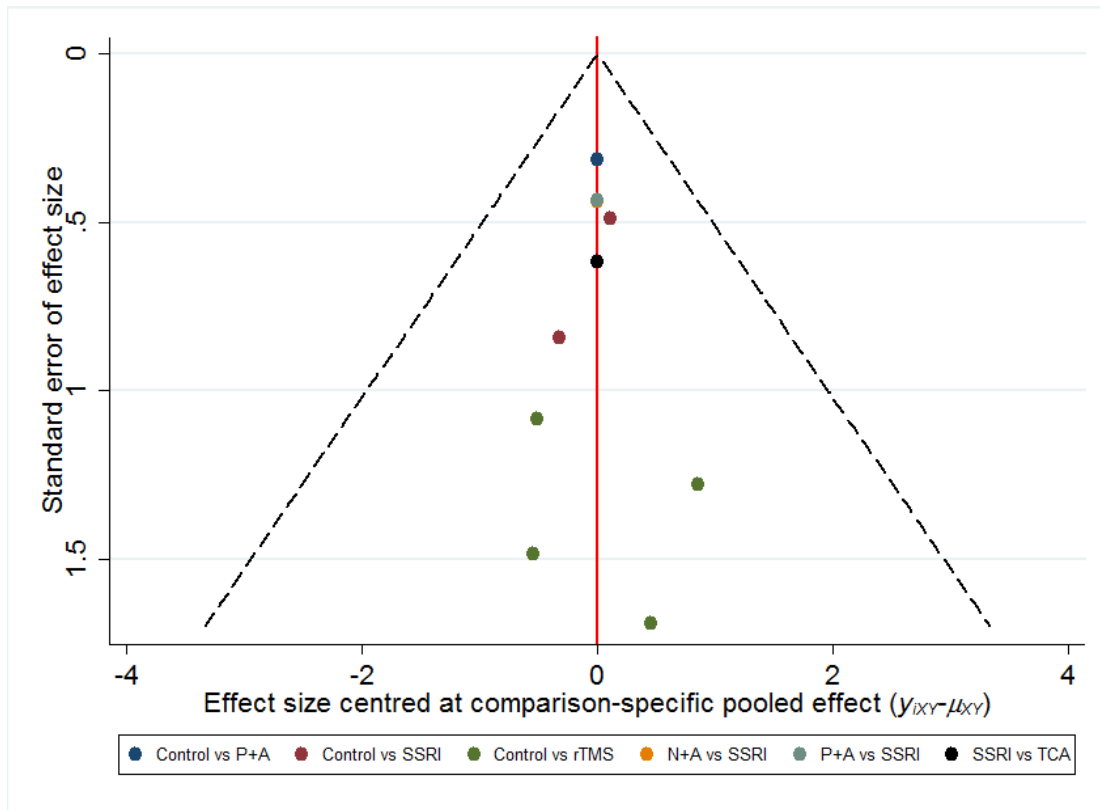

SSRI= selective serotonin reuptake inhibitor. TCA= tricyclic antidepressant. rTMS= Repetitive Transcranial Magnetic Stimulation. P+A= psychotherapy plus antidepressants. N+A= nimodipine plus antidepressants.

**Table1. Risk of bias and sponsorship of included studies**

| Study | Random sequence generation | Allocation concealment | Participant blinding | Investigator binding | Incomplete outcome data | Selective reporting | Other source of bias | Industry sponsorship |
|-------|----------------------------|------------------------|----------------------|----------------------|-------------------------|---------------------|----------------------|----------------------|
|-------|----------------------------|------------------------|----------------------|----------------------|-------------------------|---------------------|----------------------|----------------------|



|                |         |         |         |         |         |         |     |         |
|----------------|---------|---------|---------|---------|---------|---------|-----|---------|
| Huang 2005     | Unclear | Unclear | Unclear | Unclear | Low     | Low     | Low | Unclear |
| Ye 2006        | Unclear | Unclear | Low     | Low     | Low     | Unclear | Low | Unclear |
| Li 2008        | Low     | Low     | Low     | Low     | Low     | Low     | Low | Low     |
| Cravello 2009  | Unclear | Unclear | High    | Low     | Low     | Unclear | Low | Unclear |
| Dimitrios 2012 | Unclear | Unclear | High    | High    | Low     | Low     | Low | Low     |
| Jorge 2004     | Unclear | Unclear | Low     | Low     | Low     | Low     | Low | Low     |
| Jorge 2008     | Unclear | Unclear | Low     | Low     | Low     | Low     | Low | Low     |
| Narushima 2010 | Unclear | Unclear | Unclear | Unclear | Unclear | Unclear | Low | Low     |
| Tenev 2010     | Unclear | Unclear | Low     | Low     | Low     | Low     | Low | Unclear |
| Seo 2016       | Unclear | Unclear | Low     | Low     | Low     | Low     | Low | Low     |

|               |         |         |         |         |     |     |                      |         |
|---------------|---------|---------|---------|---------|-----|-----|----------------------|---------|
| Feng 2004     | Unclear | Unclear | Unclear | Unclear | Low | Low | Low                  | Unclear |
| Williams 2007 | Low     | Low     | High    | Low     | Low | Low | Unclear <sup>c</sup> | Low     |
| Mitchell 2009 | Low     | Low     | Unclear | Low     | Low | Low | Low                  | Low     |

<sup>a</sup> the intervention group and control group were divided randomly, but the 2 intervention group were divided according to their medical condition.

<sup>b</sup> the dropout rate was significantly greater in the fluoxetine group than in the nortriptyline and placebo groups ( $\chi^2=4.10$ ,  $df=1$ ,  $p=0.04$ )

<sup>c</sup> 52 of the 93 control subjects (56%) took an antidepressant at some time during the 12-week study period

**Appendix 6: Network plot for each outcome**

(A) Network diagram of eligible comparisons for response rate between individual treatment

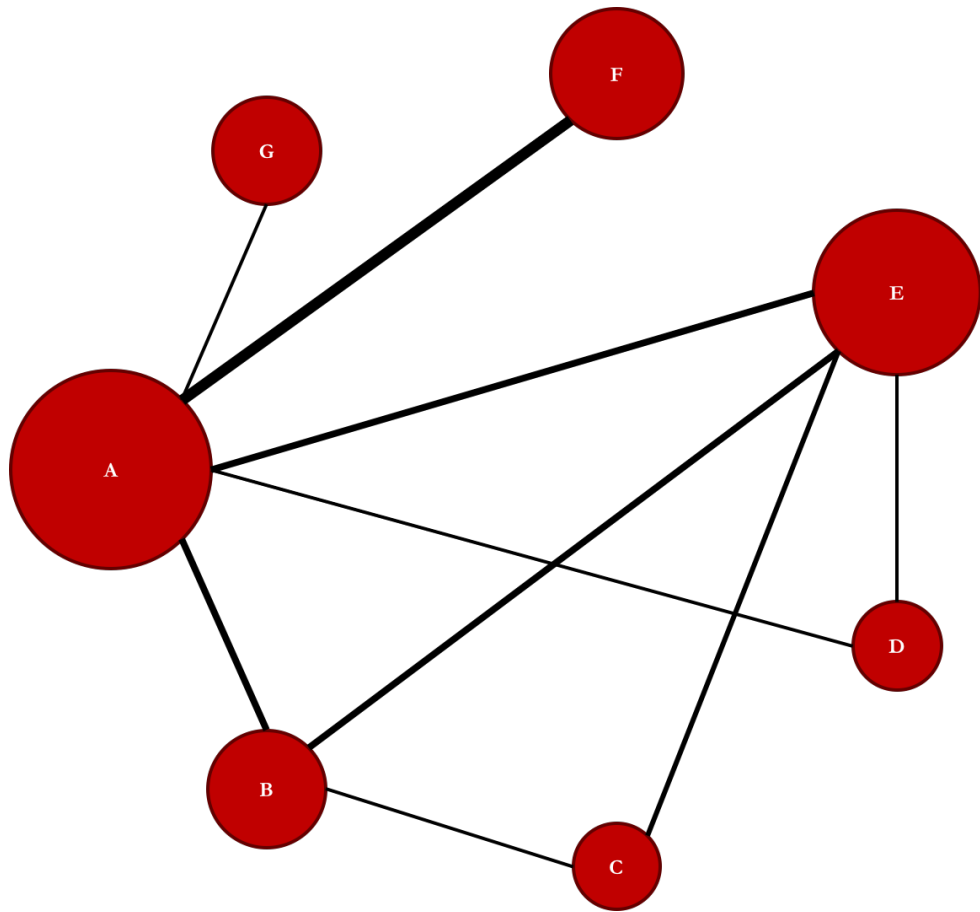

A=control; B=TCA; C=N+A; D=TCM; E=SSRI; F=rTMS; G=P+A

SSRI= selective serotonin reuptake inhibitor

TCA= tricyclic antidepressant

N+A= nimodipine plus antidepressants

TCM= traditional Chinese medicine

rTMS= Repetitive Transcranial Magnetic Stimulation

P+A= psychotherapy plus antidepressants

(B) Network diagram of eligible comparisons for remission rate between individual treatment

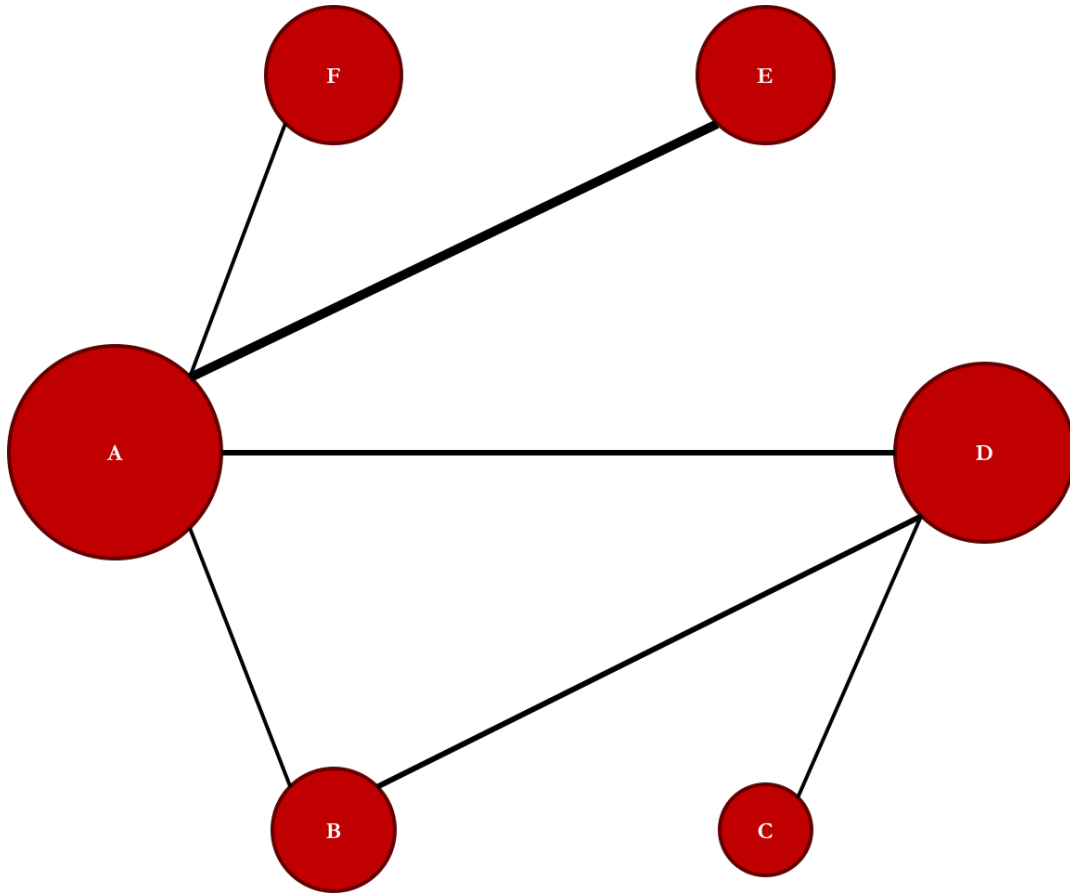

A=control; B=TCA; C=N+A; D=SSRI; E=rTMS; F=P+A

SSRI= selective serotonin reuptake inhibitor

TCA= tricyclic antidepressant

N+A= nimodipine plus antidepressants

rTMS= Repetitive Transcranial Magnetic Stimulation

P+A= psychotherapy plus antidepressants

**Appendix 7: Assessment of inconsistency**

**1. Evaluation of the local inconsistency by loop specific approach**

(A) Evaluation of the local inconsistency for HAMD score change

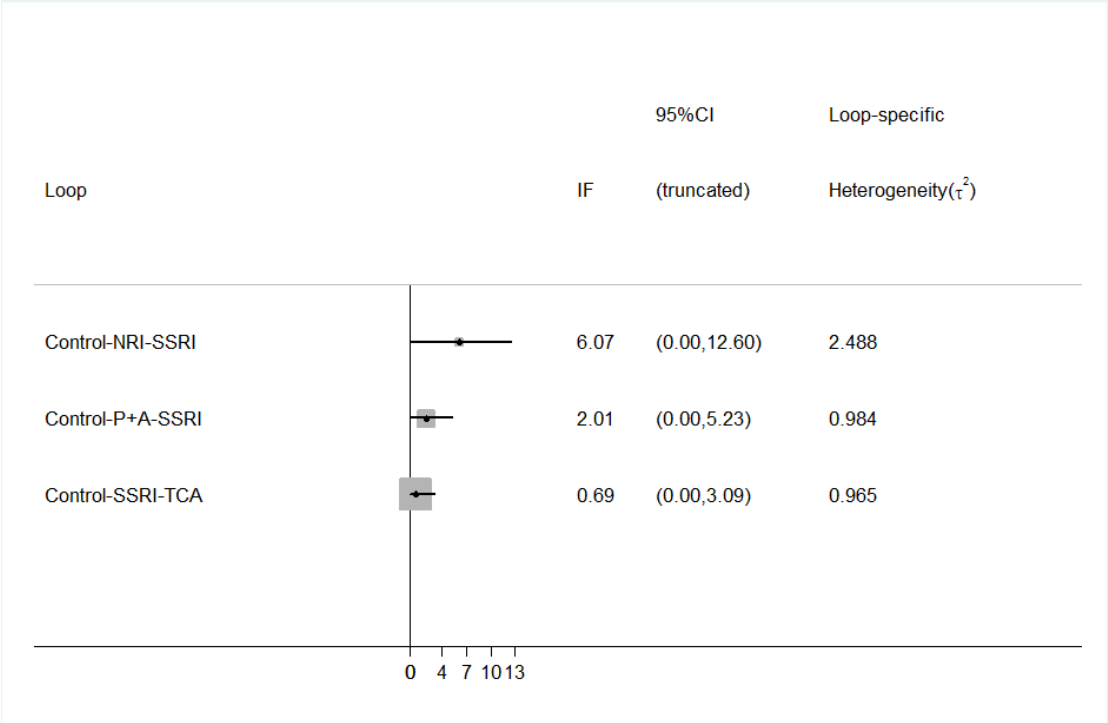

(B) Evaluation of the local inconsistency for patient response rate

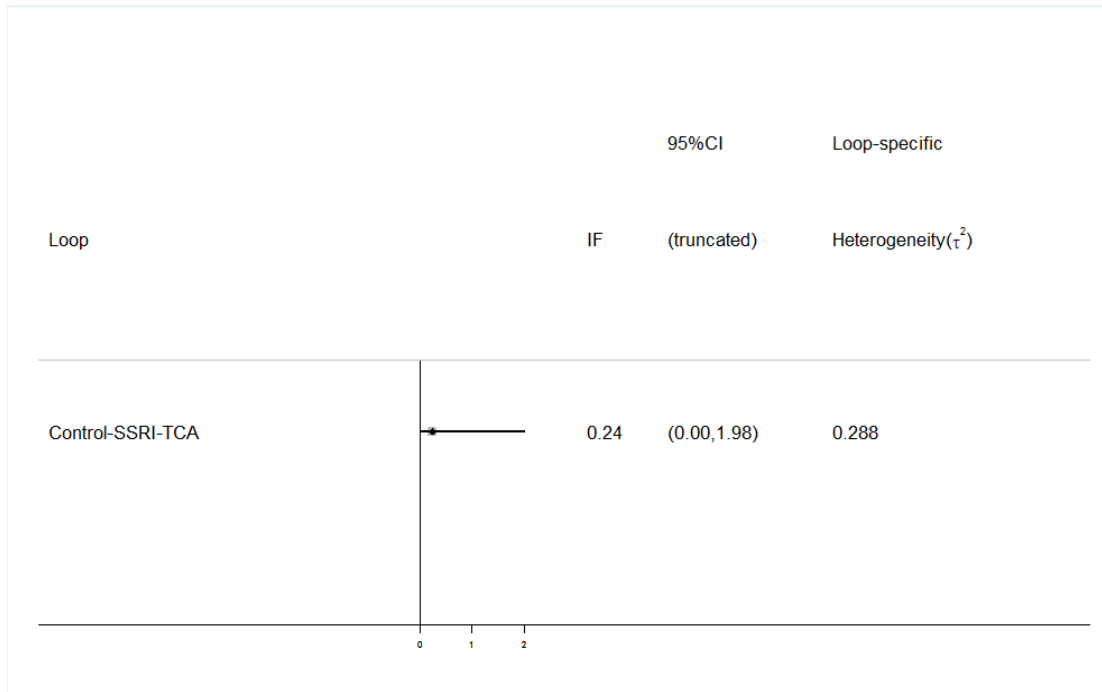

(C) Evaluation of the local inconsistency for patient remission rate



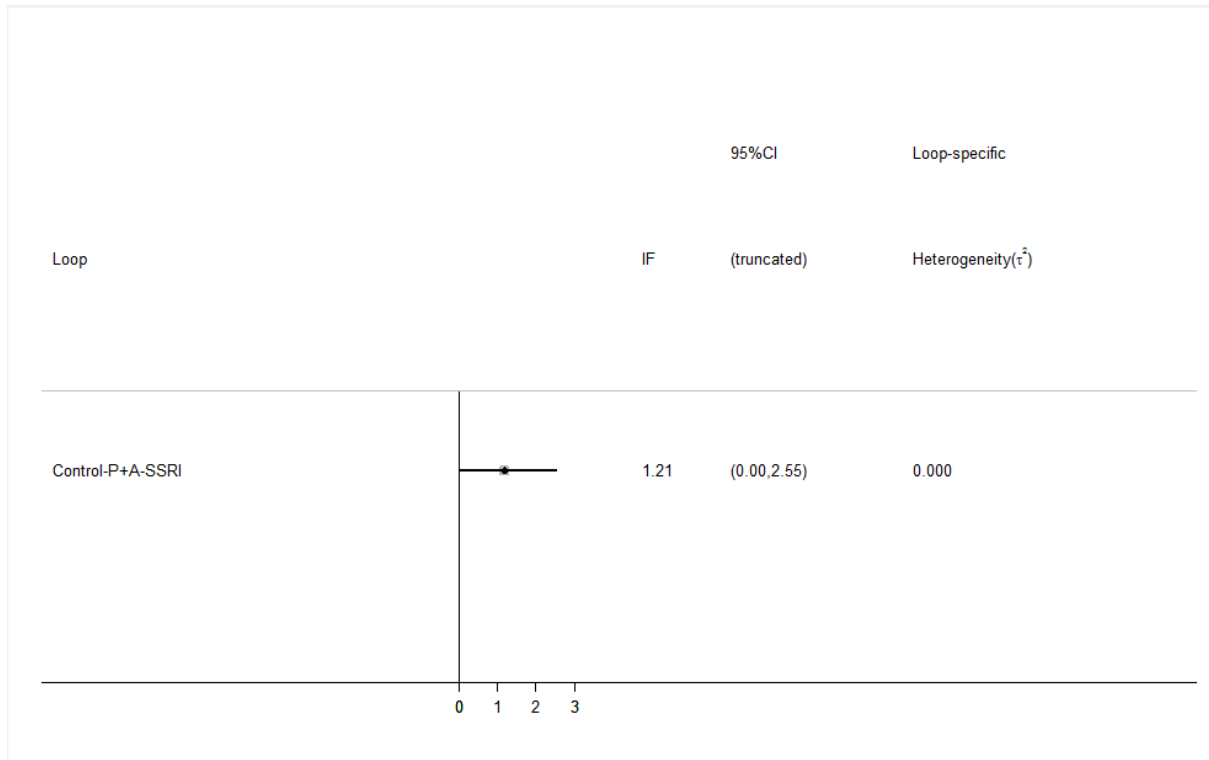

## 2. Evaluation of the inconsistency by node-splitting model Tests

(A) Evaluation of the inconsistency by node-splitting model tests for HAMD score change

| Name            | Direct Effect          | Indirect Effect      | P-Value |
|-----------------|------------------------|----------------------|---------|
| NRI vs. Control | -13.35 (-26.28, -0.22) | -4.76 (-15.01, 5.67) | 0.29    |
| NRI vs. SSRIs   | 0.66 (-8.72, 9.68)     | -8.10 (-21.98, 5.79) | 0.27    |

|                   |                      |                      |      |
|-------------------|----------------------|----------------------|------|
| Control vs. P+A   | 1.98 (-10.90, 14.66) | 13.17 (-0.78, 26.73) | 0.23 |
| Control vs. SSRIs | 6.26 (0.59, 11.99)   | 7.66 (-1.89, 16.97)  | 0.79 |
| Control vs. TCA   | 8.30 (2.82, 13.88)   | 4.88 (-9.63, 19.84)  | 0.64 |
| P+A vs. SSRIs     | -6.18 (-18.77, 7.04) | 4.96 (-8.71, 18.77)  | 0.23 |
| SSRIs vs. TCA     | 1.38 (-5.68, 8.48)   | -0.71 (-10.67, 9.22) | 0.72 |

(B) Evaluation of the inconsistency by node-splitting model tests for patient response rate

| Name             | Direct Effect       | Indirect Effect     | P-Value |
|------------------|---------------------|---------------------|---------|
| Control vs. TCA  | 2.01 (0.80, 3.30)   | 0.77 (-1.96, 3.43)  | 0.35    |
| Control vs. SSRI | 0.82 (-0.45, 1.93)  | 2.04 (-0.75, 4.74)  | 0.35    |
| TCA vs. SSRI     | -0.86 (-2.40, 0.56) | -0.95 (-3.14, 1.16) | 0.93    |

(C) Evaluation of the inconsistency by node-splitting model tests for patient remission rate

| Name             | Direct Effect      | Indirect Effect     | P-Value |
|------------------|--------------------|---------------------|---------|
| Control vs. SSRI | 1.43 (-0.25, 3.37) | -0.50 (-3.43, 2.56) | 0.16    |
| Control vs. P+A  | 0.77 (-1.32, 2.80) | 2.85 (0.29, 5.72)   | 0.14    |
| SSRI vs. P+A     | 1.38 (-0.64, 3.36) | -0.60 (-3.33, 1.90) | 0.14    |

SSRI= selective serotonin reuptake inhibitor

TCA= tricyclic antidepressant

P+A= psychotherapy plus antidepressants

### Appendix 8: Treatment ranking and SUCRA plot for each outcome

(A) All treatment

| Treatment strategy | HAMD overall change | Patient response rate | Patient remission rate |
|--------------------|---------------------|-----------------------|------------------------|
| N+A                | 0.9487              | 0.5431                | 0.6937                 |
| NRI                | 0.6906              | -                     | -                      |
| TCA                | 0.5568              | 0.8056                | 0.6733                 |
| P+A                | 0.5242              | 0.3413                | 0.3402                 |
| SSRI               | 0.5205              | 0.4014                | 0.3841                 |
| TCM                | 0.4592              | 0.4954                | -                      |
| SNRI               | 0.3832              | -                     | -                      |
| Psychotherapy      | 0.3237              | -                     | -                      |
| rTMS               | 0.3041              | 0.8648                | 0.8389                 |
| Control            | 0.2910              | 0.0484                | 0.0699                 |

Larger SUCRAs denote better procedure.

(B) Pharmacotherapy

| Treatment strategy | HAMD overall change | Patient response rate | Patient remission rate |
|--------------------|---------------------|-----------------------|------------------------|
| Paroxetine         | 0.9087              | 0.7113                | 0.5221                 |
| Imipramine         | 0.6996              | 0.6756                | 0.4728                 |
| Reboxetione        | 0.6868              | -                     | -                      |
| Nortriptyline      | 0.6342              | 0.8322                | -                      |

|               |        |        |        |
|---------------|--------|--------|--------|
| Duloxetine    | 0.6105 | -      | -      |
| Citalopram    | 0.5992 | -      | 0.9844 |
| Sertraline    | 0.4332 | -      | -      |
| Psychotherapy | 0.4137 | -      | -      |
| FEWP          | 0.4101 | 0.4659 | -      |
| Fluoxetine    | 0.3280 | 0.3043 | -      |
| Clomipramine  | 0.3272 | 0.3221 | -      |
| Venlafaxine   | 0.2421 | -      | -      |
| Control       | 0.1511 | 0.1889 | 0.0232 |

Larger SUCRAs denote better procedure.

SSRI= selective serotonin reuptake inhibitor

TCA= tricyclic antidepressant

SNRI= serotonin–norepinephrine reuptake inhibitors

NRI= norepinephrine reuptake inhibitor

N+A= nimodipine plus antidepressants

TCM= traditional Chinese medicine

rTMS= Repetitive Transcranial Magnetic Stimulation

P+A= psychotherapy plus antidepressants

FEWP=Free and Easy Wanderer Plus (a kind of Chinese medicine; its original Chinese Name is Jia-Wei-Xiao-Yao-San)

Appendix 9: Subgroup analysis

(A) Network diagram of eligible comparisons for response rate between individual pharmacotherapy

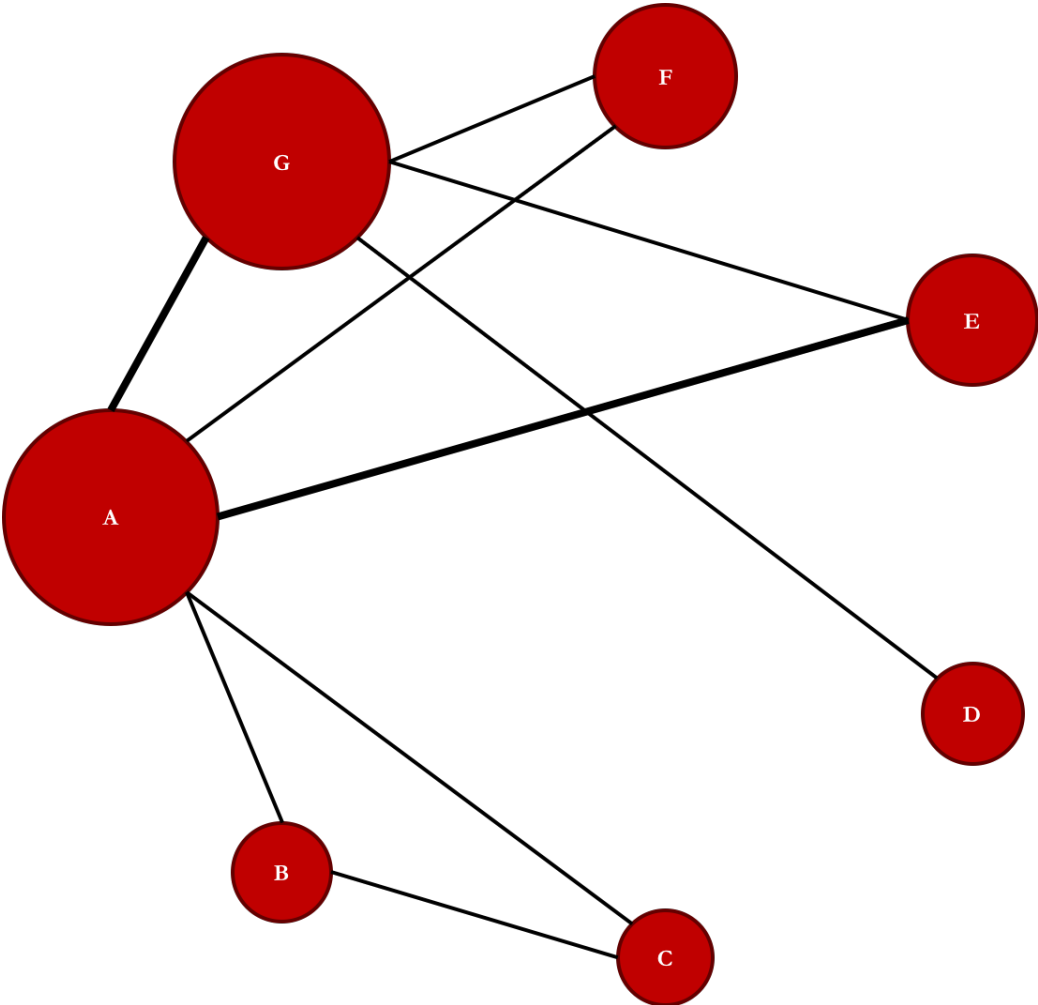

A= control; B=paroxetine; C=imipramine; D=clomipramine; E=nortriptyline; F= Free and Easy Wanderer Plus(a kind of Chinese medicine; its original Chinese Name is Jia-Wei-Xiao-Yao-San) ; G=fluoxetine

(B) Network diagram of eligible comparisons for remission rate between individual pharmacotherapy

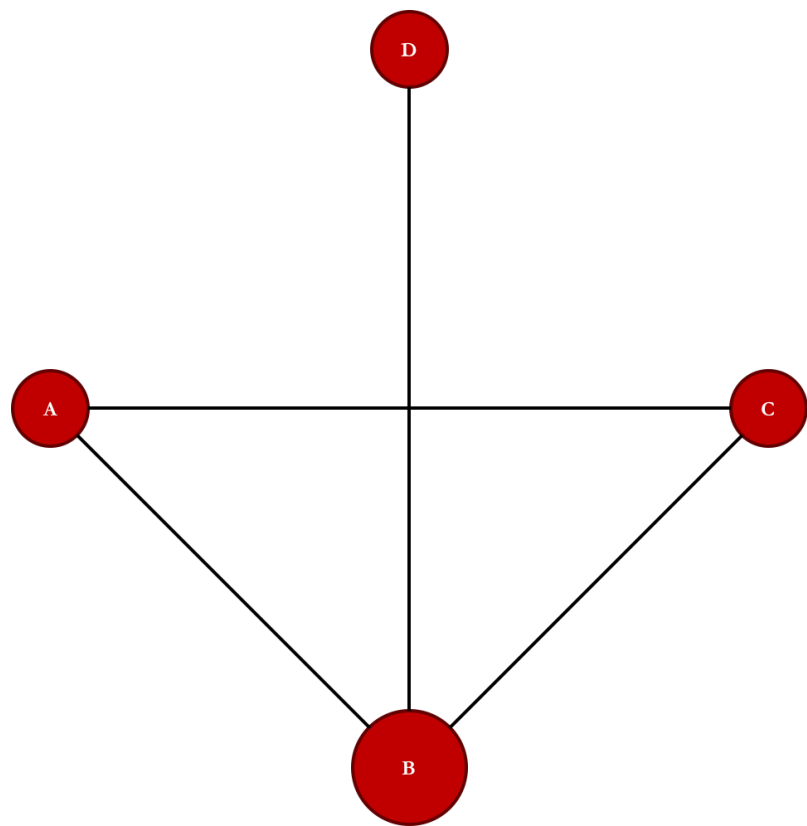

A= control; B=paroxetine; C=imipramine; D=citalopram

|                         |                         |                         |                        |                        |                       |                |
|-------------------------|-------------------------|-------------------------|------------------------|------------------------|-----------------------|----------------|
| <b>Nortriptyline</b>    |                         |                         |                        |                        |                       |                |
| 1.55<br>(0.06 - 45.38)  | <b>Paroxetine</b>       |                         |                        |                        |                       |                |
| 1.73<br>(0.06 - 46.36)  | 1.16<br>(0.07 - 18.58)  | <b>Imipramine</b>       |                        |                        |                       |                |
| 4.30<br>(0.22 - 73.15)  | 2.99<br>(0.06 - 100.49) | 2.48<br>(0.05 - 96.71)  | <b>FEWP</b>            |                        |                       |                |
| 7.68<br>(0.25 - 269.20) | 5.00<br>(0.07 - 444.64) | 4.41<br>(0.07 - 348.19) | 1.74<br>(0.05 - 88.86) | <b>Clomipramine</b>    |                       |                |
| 7.18<br>(1.14 - 68.40)  | 4.95<br>(0.20 - 131.23) | 4.04<br>(0.18 - 109.08) | 1.59<br>(0.18 - 20.07) | 0.94<br>(0.06 - 17.69) | <b>Fluoxetine</b>     |                |
| 10.02<br>(1.82 - 52.56) | 6.66<br>(0.36 - 99.90)  | 5.73<br>(0.32 - 86.56)  | 2.32<br>(0.21 - 26.02) | 1.30<br>(0.04 - 28.24) | 1.43<br>(0.26 - 5.56) | <b>Control</b> |

figure A: Summary odds ratio (OR) and credible intervals from network meta-analysis of response rate of individual pharmacotherapy

Treatments are reported in order of efficacy ranking according to SUCRAs. Comparisons should be read from left to right. The response rate and remission rate estimate is located at the intersection of the column-defining treatment and the row-defining treatment. An OR value below 1 favours the column-defining treatment. To obtain ORs for comparisons in the opposing direction, reciprocals should be taken. Significant results are in bold and underlined. FEWP=Free and Easy Wanderer Plus (a kind of Chinese medicine; its original Chinese name is Jia-Wei-Xiao-Yao-San)

|                                 |                               |                        |                |
|---------------------------------|-------------------------------|------------------------|----------------|
| <b>Citalopram</b>               |                               |                        |                |
| <b>3.97</b><br>(1.29 - 12.04)   | <b>Paroxetine</b>             |                        |                |
| 4.55<br>(0.82 - 26.81)          | 1.14<br>(0.34 - 4.25)         | <b>Imipramine</b>      |                |
| <b>18.50</b><br>(2.75 - 149.70) | <b>4.57</b><br>(1.00 - 28.00) | 4.04<br>(0.84 - 23.78) | <b>Control</b> |

figure B: Summary odds ratio (OR) and credible intervals from network meta-analysis of remission rate of individual pharmacotherapy

Treatments are reported in order of efficacy ranking according to SUCRAs. Comparisons should be read from left to right. The response rate and remission rate estimate is located at the intersection of the column-defining treatment and the row-defining treatment. An OR value below 1 favours the column-defining treatment. To obtain ORs for comparisons in the opposing direction, reciprocals should be taken. Significant results are in bold and underlined. FEWP=Free and Easy Wanderer Plus (a kind of Chinese medicine; its original Chinese name is Jia-Wei-Xiao-Yao-San)

## Appendix 10: Post hoc analysis

| Study       | Location | Participants<br>(N) | Intervention/control (N)    | Drop-out rate<br>(%) | Treatment<br>duration | Follow-up | Setting   | Center        | Depression<br>Diagnostic criteria | Population |
|-------------|----------|---------------------|-----------------------------|----------------------|-----------------------|-----------|-----------|---------------|-----------------------------------|------------|
| Wiert 2000  | France   | 31                  | Fluoxetine 16<br>Placebo    | 12.5<br>0            | 45 days               | 45days    | inpatient | single center | ICD-10                            | ITT        |
| Murray 2005 | Sweden   | 123                 | Sertraline 62<br>Placebo 61 | 18<br>10             | 6 weeks               | 26 weeks  | inpatient | multi-center  | DSM-IV                            | ITT        |

| Study              | intervention/control<br>(N) | Mean age<br>(SD) | Gender<br>(%, male) | Mean baseline<br>HAMD/MADRS (SD) | Hemisphere stroke side<br>(%, left) | Depression diagnosis<br>N (%, major depression) | Time since stroke onset |
|--------------------|-----------------------------|------------------|---------------------|----------------------------------|-------------------------------------|-------------------------------------------------|-------------------------|
| <b>Wiert 2000</b>  | Fluoxetine(N=16)            | 66.3(7.1)        | 56.3                | 28.5(7.7)                        | 25                                  | 100%                                            | 47.1(21.6) days         |
|                    | Placebo(N=15)               | 68.9(11.6)       | 40                  | 27.2(6.3)                        | 20                                  |                                                 | 47.7(19.9) days         |
| <b>Murray 2005</b> | Sertraline(N=62)            | 70.7(9.7)        | 51.6                | 18.9(6.1)                        | 56.6                                | 66.1                                            | 137.3(101.4) days       |
|                    | Place(N=61)                 | 70.7(10.1)       | 44.3                | 19.6(6.1)                        | 33.3                                | 57.4                                            | 119.0(92.5) days        |

## Results of Post hoc sensitivity analysis

| Post hoc sensitivity analysis of primary main outcome |                           |                                                 |                                     |
|-------------------------------------------------------|---------------------------|-------------------------------------------------|-------------------------------------|
| Comparisons                                           | Network Meta-Analysis     | Rankings of post<br>hoc sensitivity<br>analysis | Rankings of<br>previous<br>analysis |
| N+A VS CONTROL                                        | 9.29 (-0.28, 18.42)       | 1                                               | 1                                   |
| <u>NRI VS CONTROL</u>                                 | <u>8.44 (2.67, 14.26)</u> | 2                                               | 2                                   |
| <u>TCA VS CONTROL</u>                                 | <u>7.72 (4.13, 11.29)</u> | 3                                               | 3                                   |



|                                                    |                               |                                           |                               |
|----------------------------------------------------|-------------------------------|-------------------------------------------|-------------------------------|
| <u>P+A VS CONTROL</u>                              | <u>7. 41 (0. 81, 14. 38)</u>  | 4                                         | 4                             |
| <u>SSRI VS CONTROL</u>                             | <u>6. 60 (3. 43, 9. 79)</u>   | 5                                         | 5                             |
| SNRI VS CONTROL                                    | 6. 22 (-2. 00, 13. 70)        | <u>6</u>                                  | <u>7</u>                      |
| TCM VS CONTROL                                     | 5. 71 (-2. 26, 13. 33)        | <u>7</u>                                  | <u>6</u>                      |
| Psychotherapy VS CONTROL                           | 4. 88 (-4. 45, 14. 40)        | 8                                         | 8                             |
| rTMS VS CONTROL                                    | 3. 57 (-0. 77, 7. 81)         | 9                                         | 9                             |
| Post hoc sensitivity analysis of subgroup analysis |                               |                                           |                               |
| Comparisons                                        | Network Meta-Analysis         | Rankings of post hoc sensitivity analysis | Rankings of previous analysis |
| <u>Paroxetine VS Placebo</u>                       | <u>13. 26 (3. 32, 23. 11)</u> | 1                                         | 1                             |
| <u>Imipramine VS Placebo</u>                       | <u>11. 30 (1. 43, 21. 58)</u> | 2                                         | 2                             |
| <u>Reboxetine VS Placebo</u>                       | <u>8. 52 (1. 53, 15. 24)</u>  | 3                                         | 3                             |
| <u>Nortriptyline VS Placebo</u>                    | <u>7. 75 (3. 77, 12. 07)</u>  | 4                                         | 4                             |
| <u>Citalopram VS Placebo</u>                       | <u>6. 63 (0. 29, 12. 64)</u>  | <u>5</u>                                  | <u>6</u>                      |
| Duloxetine VS Placebo                              | 5. 72 (-4. 64, 16. 37)        | <u>6</u>                                  | <u>5</u>                      |
| <u>Fluoxetine VS Placebo</u>                       | <u>5. 15 (0. 40, 9. 72)</u>   | <u>7</u>                                  | <u>9</u>                      |
| FEWP VS Placebo                                    | 4. 98 (-3. 21, 13. 35)        | 8                                         | 8                             |
| Venlafaxine VS Placebo                             | 3. 47 (-7. 20, 14. 20)        | <u>9</u>                                  | <u>11</u>                     |
| Clomipramine VS Placebo                            | 3. 86 (-5. 96, 14. 43)        | 10                                        | 10                            |
| Sertraline VS Placebo                              | 3. 02 (-4. 96, 11. 03)        | <u>11</u>                                 | <u>7</u>                      |
